# Supplementary material for: The Binary Protein Interactome of Treponema pallidum – The Syphilis Spirochete
Source: PubMed Central journal article supplement (PMC2386257; doi:10.1371/journal.pone.0002292), 2008-05-28

Figure 5

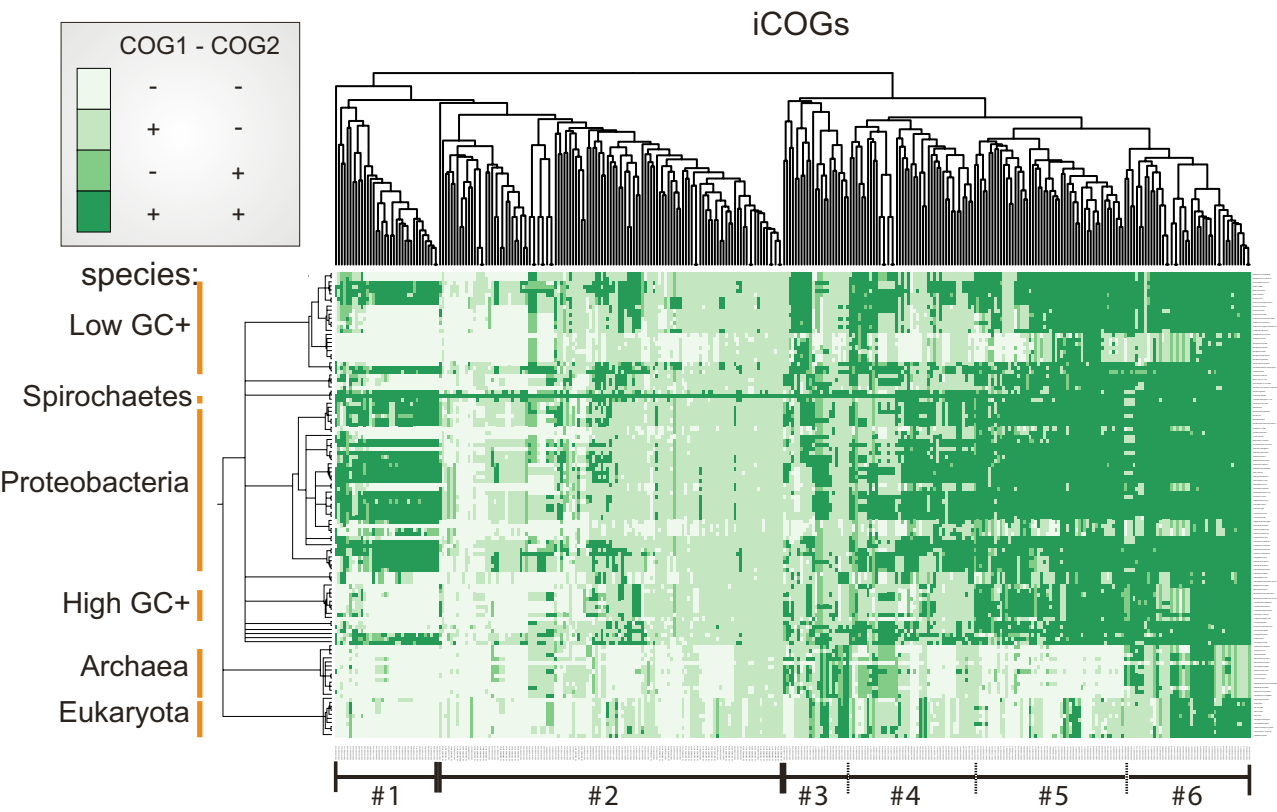

Supplement: pone.0002292.s007.pdf [file pone.0002292.s007.pdf]
