# Supplementary material for: The Binary Protein Interactome of Treponema pallidum – The Syphilis Spirochete
Source: PLoS One. 2008 May 28;3(5):e2292. doi: 10.1371/journal.pone.0002292 (PMC2386257; doi:10.1371/journal.pone.0002292)
Supplement: Table S3 — All proteins involved in DNA metabolism as well as their interactions as shown in Figure 4. (0.07 MB XLS) [file pone.0002292.s003.xls]

## Sheet: DNA METABOLISM PROTEINS
Table S3a: DNA metabolism proteins of T. pallidum
	Note that the source file contains a second sheet.
T. pallidum proteins involved in DNA metabolism from the TIGR, COG, KEGG databases.
Protein: T. pallidum protein with annotated involvement in DNA metabolism
Defline: definition line for protein
Source: database, which classifies the respective protein as a DNA metabolism protein:
http://www.tigr.org/CMR, http://www.ncbi.nlm.nih.gov/COG, http://www.genome.jp/kegg/
Protein	DEFLINE	SOURCE
TP0001	chromosomal replication initiator protein (dnaA)	TIGR COG KEGG
TP0002	DNA polymerase III, subunit beta (dnaN)	KEGG COG TIGR
TP0003	recF protein (recF)	TIGR KEGG COG
TP0005	DNA gyrase, subunit A (gyrA)	TIGR COG KEGG
TP0044	glucose inhibited division protein A (gidA)	TIGR
TP0058	replicative DNA helicase (dnaB)	COG TIGR KEGG
TP0062	single-strand DNA binding protein (ssb)	KEGG COG TIGR
TP0065	hypothetical protein	COG
TP0102	rep helicase, single-stranded DNA-dependent ATPase	KEGG TIGR COG
TP0103	ATP-dependent DNA helicase, putative	KEGG TIGR COG
TP0105	DNA polymerase I (polA)	COG KEGG COG TIGR
TP0116	excinuclease ABC, subunit B (uvrB)	COG TIGR KEGG
TP0125	exodeoxyribonuclease (ExoA)	KEGG COG TIGR
TP0141	methylated-DNA-protein-cysteine S-methyltransferase	COG TIGR KEGG
TP0162	Holliday junction DNA helicase (ruvB)	COG TIGR KEGG
TP0229	DNA polymerase, bacteriophage-type	KEGG COG TIGR
TP0230	primosomal protein N (priA)	COG TIGR KEGG
TP0251	DNA-binding protein II	TIGR COG
TP0303	DNA mismatch repair protein (mutL)	COG TIGR KEGG
TP0310	hypothetical protein	COG
TP0328	DNA mismatch repair protein (mutS)	KEGG TIGR COG
TP0343	A/G-specific adenine glycosylase, putative	KEGG COG TIGR
TP0344	transcription-repair coupling factor	COG TIGR KEGG
TP0353	ribonuclease H (rnhA) [EC:3.1.26.4]	KEGG COG
TP0380	DNA repair helicase, putative	TIGR COG
TP0391	integrase/recombinase (codV)	TIGR KEGG COG
TP0393	"smf protein (smf); K04096 DNA processing protein"	KEGG COG
TP0394	"DNA topoisomerase I (topA) [EC:5.99.1.2]; K03168	COG TIGR COG KEGG
TP0395	integrase/recombinase (XprB)	COG TIGR
TP0408	hypothetical protein	COG
TP0442	DNA repair protein (recN)	KEGG COG TIGR
TP0472	excinuclease ABC, subunit C (uvrC)	COG TIGR KEGG
TP0492	DNA primase (dnaG)	KEGG COG TIGR
TP0514	excinuclease ABC, subunit A (uvrA)	COG TIGR KEGG
TP0517	Holliday junction nuclease (ruvC)	KEGG COG TIGR
TP0521	DNA polymerase III, gamma and tau subunits, putative	KEGG COG TIGR
TP0526	ATP-dependent helicase (HrpA)	COG TIGR
TP0543	Holliday junction DNA helicase (ruvA)	COG TIGR KEGG
TP0588	putative DNA polymerase III, delta subunit	COG KEGG
TP0626	exonuclease, putative; K03547 exonuclease SbcD	TIGR KEGG COG
TP0627	sbcC; exonuclease; K03546 exonuclease SbcC	TIGR KEGG COG
TP0634	DNA ligase (lig) [EC:6.5.1.2]	KEGG COG TIGR
TP0636	hypothetical protein	COG
TP0643	DNA polymerase III, subunit epsilon (dnaQ)	TIGR COG KEGG
TP0669	DNA polymerase III, subunit alpha (dnaE)	COG TIGR KEGG
TP0687	DNA recombinase (recG)	TIGR COG KEGG
TP0691	putative segregation and condensation protein A	TIGR
TP0692	recA protein (recA)	COG TIGR KEGG
TP0704	recJ; single-stranded-DNA-specific exonuclease	TIGR KEGG COG
TP0710	hypothetical protein	COG
TP0731	hypothetical protein	COG
TP0770	ATP-dependent RNA helicase	COG
TP0775	nth; endonuclease III (nth)	COG KEGG TIGR
TP0810	dam; DNA adenine methyltransferase (dam)	KEGG TIGR COG
TP0898	ATP-dependent nuclease, subunit A	TIGR COG
TP0899	hypothetical protein	COG
TP0913	predicted endonuclease	KEGG COG
TP0946	glucose-inhibited division protein B (gidB)	TIGR
TP0979	putative deoxyribonuclease	COG
TP0994	putative deoxyribonuclease	COG
TP1004	recombination protein (recR)	TIGR COG KEGG
TP1005	DNA polymerase III, subunits gamma and tau (dnaH)	COG KEGG TIGR
TP1006	DNA gyrase, subunit B (gyrB)	KEGG TIGR COG
TP1022	DNA repair protein	TIGR KEGG
TP1023	recX protein (recX)	TIGR
TP1028	uvrD; DNA helicase II (UvrD)	TIGR COG KEGG

## Sheet: DNA METABOLISM INTERACTIONS
Table S3b. Interactions of integrated DNA metabolism network for T. pallidum (shown in Fig. 4)
Protein A/Protein B: interacting proteins (or orthologous proteins predicted to interact in T. pallidum, see methods).
name: gene name
defline: definition line taken from KEGG database
source: the interactions of this integrated network were either found in our study (high-confidence dataset, TPA HCI, highlighted in red) or predicted for T. pallidum through orthologous gene relationships (see methods). The high-confidence sources are: high-confidence C. jejuni Y2H set "CJE Parrish" (Parrish et al. 2007), two socio-affinity-index (SAI) filtered E. coli coAP/MS sets "ECO Butland"…
PROTEIN A	NAME	DEFLINE	PROTEIN B	NAME	DEFLINE	SOURCE
TP0001	dnaA	chromosomal replication initiator protein (DnaA); K02313 chromosomal replication initiator protein DnaA	TP0001	dnaA	chromosomal replication initiator protein (DnaA); K02313 chromosomal replication initiator protein DnaA	BSU Noirot-Gros
TP0001	dnaA	chromosomal replication initiator protein (DnaA); K02313 chromosomal replication initiator protein DnaA	TP0003	recF	RecF protein (RecF); K03629 DNA replication and repair protein RecF	ECO Arifuzzaman
TP0001	dnaA	chromosomal replication initiator protein (DnaA); K02313 chromosomal replication initiator protein DnaA	TP0003	recF	RecF protein (RecF); K03629 DNA replication and repair protein RecF	String DB
TP0001	dnaA	chromosomal replication initiator protein (DnaA); K02313 chromosomal replication initiator protein DnaA	TP0058	dnaB	replicative DNA helicase (DnaB) [EC:3.6.1.-]; K02314 replicative DNA helicase	TPA HCI		1
TP0001	dnaA	chromosomal replication initiator protein (DnaA); K02313 chromosomal replication initiator protein DnaA	TP0058	dnaB	replicative DNA helicase (DnaB) [EC:3.6.1.-]; K02314 replicative DNA helicase	String DB
TP0001	dnaA	chromosomal replication initiator protein (DnaA); K02313 chromosomal replication initiator protein DnaA	TP0183	TP0183	hypothetical protein	TPA HCI		2
TP0001	dnaA	chromosomal replication initiator protein (DnaA); K02313 chromosomal replication initiator protein DnaA	TP0272	TP0272	SpoOJ regulator (soj); K03496 chromosome partitioning protein	CJE Parrish
TP0001	dnaA	chromosomal replication initiator protein (DnaA); K02313 chromosomal replication initiator protein DnaA	TP1005	dnaH	DNA polymerase III subunits gamma and tau [EC:2.7.7.7]; K02343 DNA polymerase III subunit gamma/tau	ECO Arifuzzaman
TP0001	dnaA	chromosomal replication initiator protein (DnaA); K02313 chromosomal replication initiator protein DnaA	TP1005	dnaH	DNA polymerase III subunits gamma and tau [EC:2.7.7.7]; K02343 DNA polymerase III subunit gamma/tau	String DB
TP0002	dnaN	DNA polymerase III, subunit beta (DnaN) [EC:2.7.7.7]; K02338 DNA polymerase III subunit beta	TP0002	dnaN	DNA polymerase III, subunit beta (DnaN) [EC:2.7.7.7]; K02338 DNA polymerase III subunit beta	BSU Noirot-Gros
TP0002	dnaN	DNA polymerase III, subunit beta (DnaN) [EC:2.7.7.7]; K02338 DNA polymerase III subunit beta	TP0058	dnaB	replicative DNA helicase (DnaB) [EC:3.6.1.-]; K02314 replicative DNA helicase	BSU Noirot-Gros
TP0002	dnaN	DNA polymerase III, subunit beta (DnaN) [EC:2.7.7.7]; K02338 DNA polymerase III subunit beta	TP0058	dnaB	replicative DNA helicase (DnaB) [EC:3.6.1.-]; K02314 replicative DNA helicase	String DB
TP0002	dnaN	DNA polymerase III, subunit beta (DnaN) [EC:2.7.7.7]; K02338 DNA polymerase III subunit beta	TP0160	proS	prolyl-tRNA synthetase [EC:6.1.1.15]; K01881 prolyl-tRNA synthetase	ECO Butland
TP0002	dnaN	DNA polymerase III, subunit beta (DnaN) [EC:2.7.7.7]; K02338 DNA polymerase III subunit beta	TP0303	mutL	DNA mismatch repair protein (MutL); K03572 DNA mismatch repair protein MutL	BSU Noirot-Gros
TP0002	dnaN	DNA polymerase III, subunit beta (DnaN) [EC:2.7.7.7]; K02338 DNA polymerase III subunit beta	TP0408	TP0408	hypothetical protein	BSU Noirot-Gros
TP0002	dnaN	DNA polymerase III, subunit beta (DnaN) [EC:2.7.7.7]; K02338 DNA polymerase III subunit beta	TP0627	sbcC	exonuclease (SbcC); K03546 exonuclease SbcC	BSU Noirot-Gros
TP0002	dnaN	DNA polymerase III, subunit beta (DnaN) [EC:2.7.7.7]; K02338 DNA polymerase III subunit beta	TP0643	dnaQ	DNA polymerase III, subunit epsilon (DnaQ) [EC:2.7.7.7]; K02342 DNA polymerase III subunit epsilon	BSU Noirot-Gros
TP0002	dnaN	DNA polymerase III, subunit beta (DnaN) [EC:2.7.7.7]; K02338 DNA polymerase III subunit beta	TP0643	dnaQ	DNA polymerase III, subunit epsilon (DnaQ) [EC:2.7.7.7]; K02342 DNA polymerase III subunit epsilon	String DB
TP0003	recF	RecF protein (RecF); K03629 DNA replication and repair protein RecF	TP0642	ManB	phosphomannomutase (ManB)	ECO Arifuzzaman
TP0004	TP0004	hypothetical protein	TP1006	gyrB	DNA gyrase, subunit B (GyrB) [EC:5.99.1.3]; K02470 DNA gyrase subunit B	TPA HCI		3
TP0005	gyrA	DNA gyrase, subunit A (GyrA) [EC:5.99.1.3]; K02469 DNA gyrase subunit A	TP0058	dnaB	replicative DNA helicase (DnaB) [EC:3.6.1.-]; K02314 replicative DNA helicase	TPA HCI		4
TP0005	gyrA	DNA gyrase, subunit A (GyrA) [EC:5.99.1.3]; K02469 DNA gyrase subunit A	TP0058	dnaB	replicative DNA helicase (DnaB) [EC:3.6.1.-]; K02314 replicative DNA helicase	String DB
TP0005	gyrA	DNA gyrase, subunit A (GyrA) [EC:5.99.1.3]; K02469 DNA gyrase subunit A	TP0492	dnaG	DNA primase (DnaG) [EC:2.7.7.-]; K02316 DNA primase	BSU Noirot-Gros
TP0005	gyrA	DNA gyrase, subunit A (GyrA) [EC:5.99.1.3]; K02469 DNA gyrase subunit A	TP0497	MreB	rod shape-determining protein (MreB); K03569 rod shape-determining protein MreB and related proteins	ECO Butland
TP0005	gyrA	DNA gyrase, subunit A (GyrA) [EC:5.99.1.3]; K02469 DNA gyrase subunit A	TP0497	MreB	rod shape-determining protein (MreB); K03569 rod shape-determining protein MreB and related proteins	String DB
TP0005	gyrA	DNA gyrase, subunit A (GyrA) [EC:5.99.1.3]; K02469 DNA gyrase subunit A	TP0606	rpsB	rpsB; 30S ribosomal protein S2; K02967 small subunit ribosomal protein S2	ECO Arifuzzaman
TP0005	gyrA	DNA gyrase, subunit A (GyrA) [EC:5.99.1.3]; K02469 DNA gyrase subunit A	TP1006	gyrB	DNA gyrase, subunit B (GyrB) [EC:5.99.1.3]; K02470 DNA gyrase subunit B	ECO Butland
TP0005	gyrA	DNA gyrase, subunit A (GyrA) [EC:5.99.1.3]; K02469 DNA gyrase subunit A	TP1006	gyrB	DNA gyrase, subunit B (GyrB) [EC:5.99.1.3]; K02470 DNA gyrase subunit B	String DB
TP0030	groL	groEL; chaperonin GroEL; K04077 chaperonin GroEL	TP0946	gidB	glucose-inhibited division protein B (GidB) [EC:2.1.-.-]; K03501 glucose inhibited division protein B	TPA HCI		5
TP0030	groL	groEL; chaperonin GroEL; K04077 chaperonin GroEL	TP0946	gidB	glucose-inhibited division protein B (GidB) [EC:2.1.-.-]; K03501 glucose inhibited division protein B	CJE Parrish
TP0044	gidA	gidA; tRNA uridine 5-carboxymethylaminomethyl modification enzyme GidA; K03495 glucose inhibited division protein A	TP0098	TP0098	heat-shock protein, putative	ECO Arifuzzaman
TP0044	gidA	gidA; tRNA uridine 5-carboxymethylaminomethyl modification enzyme GidA; K03495 glucose inhibited division protein A	TP0098	TP0098	heat-shock protein, putative	CJE Parrish
TP0044	gidA	gidA; tRNA uridine 5-carboxymethylaminomethyl modification enzyme GidA; K03495 glucose inhibited division protein A	TP0550	trmE	trmE, thdF, mnmE; tRNA modification GTPase TrmE; K03650 tRNA modification GTPase	ECO Butland
TP0044	gidA	gidA; tRNA uridine 5-carboxymethylaminomethyl modification enzyme GidA; K03495 glucose inhibited division protein A	TP0550	trmE	trmE, thdF, mnmE; tRNA modification GTPase TrmE; K03650 tRNA modification GTPase	String DB
TP0050	TP0050	hypothetical protein; K07101	TP0058	dnaB	replicative DNA helicase (DnaB) [EC:3.6.1.-]; K02314 replicative DNA helicase	TPA HCI		6
TP0058	dnaB	replicative DNA helicase (DnaB) [EC:3.6.1.-]; K02314 replicative DNA helicase	TP0058	dnaB	replicative DNA helicase (DnaB) [EC:3.6.1.-]; K02314 replicative DNA helicase	CJE Parrish
TP0058	dnaB	replicative DNA helicase (DnaB) [EC:3.6.1.-]; K02314 replicative DNA helicase	TP0058	dnaB	replicative DNA helicase (DnaB) [EC:3.6.1.-]; K02314 replicative DNA helicase	BSU Noirot-Gros
TP0058	dnaB	replicative DNA helicase (DnaB) [EC:3.6.1.-]; K02314 replicative DNA helicase	TP0064	TP0064	hypothetical protein	TPA HCI		7
TP0058	dnaB	replicative DNA helicase (DnaB) [EC:3.6.1.-]; K02314 replicative DNA helicase	TP0066	TP0066	hypothetical protein	TPA HCI		8
TP0058	dnaB	replicative DNA helicase (DnaB) [EC:3.6.1.-]; K02314 replicative DNA helicase	TP0092	TP0092	RNA polymerase sigma-24 factor (RpoE); K03088 RNA polymerase sigma-70 factor, ECF subfamily	TPA HCI		9
TP0058	dnaB	replicative DNA helicase (DnaB) [EC:3.6.1.-]; K02314 replicative DNA helicase	TP0102	Rep	rep helicase, single-stranded DNA-dependent ATPase (rep) [EC:3.6.1.-]; K03656 ATP-dependent DNA helicase Rep	TPA HCI		10
TP0058	dnaB	replicative DNA helicase (DnaB) [EC:3.6.1.-]; K02314 replicative DNA helicase	TP0578	FtsY	cell division protein (FtsY); K03110 signal recognition particle receptor	CJE Parrish
TP0058	dnaB	replicative DNA helicase (DnaB) [EC:3.6.1.-]; K02314 replicative DNA helicase	TP0578	FtsY	cell division protein (FtsY); K03110 signal recognition particle receptor	ECO Butland
TP0058	dnaB	replicative DNA helicase (DnaB) [EC:3.6.1.-]; K02314 replicative DNA helicase	TP0578	FtsY	cell division protein (FtsY); K03110 signal recognition particle receptor	String DB
TP0058	dnaB	replicative DNA helicase (DnaB) [EC:3.6.1.-]; K02314 replicative DNA helicase	TP0896	TP0896	hypothetical protein	TPA HCI		11
TP0058	dnaB	replicative DNA helicase (DnaB) [EC:3.6.1.-]; K02314 replicative DNA helicase	TP0897	tprK	tpr protein K (TprK)	TPA HCI		12
TP0058	dnaB	replicative DNA helicase (DnaB) [EC:3.6.1.-]; K02314 replicative DNA helicase	TP0913	TP0913	hypothetical protein; K07460 putative endonuclease	ECO Arifuzzaman
TP0058	dnaB	replicative DNA helicase (DnaB) [EC:3.6.1.-]; K02314 replicative DNA helicase	TP1005	dnaH	DNA polymerase III subunits gamma and tau [EC:2.7.7.7]; K02343 DNA polymerase III subunit gamma/tau	TPA HCI		13
TP0058	dnaB	replicative DNA helicase (DnaB) [EC:3.6.1.-]; K02314 replicative DNA helicase	TP1005	dnaH	DNA polymerase III subunits gamma and tau [EC:2.7.7.7]; K02343 DNA polymerase III subunit gamma/tau	BSU Noirot-Gros
TP0058	dnaB	replicative DNA helicase (DnaB) [EC:3.6.1.-]; K02314 replicative DNA helicase	TP1005	dnaH	DNA polymerase III subunits gamma and tau [EC:2.7.7.7]; K02343 DNA polymerase III subunit gamma/tau	String DB
TP0060	rplI	rplI; 50S ribosomal protein L9; K02939 large subunit ribosomal protein L9	TP0408	TP0408	hypothetical protein	ECO Arifuzzaman
TP0062	ssb	single-strand DNA binding protein (ssb); K03111 single-strand DNA-binding protein	TP0103	TP0103	ATP-dependent DNA helicase, putative [EC:3.6.1.-]; K03654 ATP-dependent DNA helicase RecQ	ECO Butland
TP0062	ssb	single-strand DNA binding protein (ssb); K03111 single-strand DNA-binding protein	TP0230	priA	primosomal protein N (PriA); K04066 primosomal protein N' (replication factor Y) (superfamily II helicase)	ECO Butland
TP0062	ssb	single-strand DNA binding protein (ssb); K03111 single-strand DNA-binding protein	TP0353	rnhA	ribonuclease H (RnhA) [EC:3.1.26.4]; K03469 ribonuclease HI	HPY Rain
TP0062	ssb	single-strand DNA binding protein (ssb); K03111 single-strand DNA-binding protein	TP0353	rnhA	ribonuclease H (RnhA) [EC:3.1.26.4]; K03469 ribonuclease HI	CJE Parrish
TP0062	ssb	single-strand DNA binding protein (ssb); K03111 single-strand DNA-binding protein	TP0353	rnhA	ribonuclease H (RnhA) [EC:3.1.26.4]; K03469 ribonuclease HI	ECO Butland
TP0062	ssb	single-strand DNA binding protein (ssb); K03111 single-strand DNA-binding protein	TP0394	topA	DNA topoisomerase I (TopA) [EC:5.99.1.2]; K03168 DNA topoisomerase I	ECO Butland
TP0062	ssb	single-strand DNA binding protein (ssb); K03111 single-strand DNA-binding protein	TP0643	dnaQ	DNA polymerase III, subunit epsilon (DnaQ) [EC:2.7.7.7]; K02342 DNA polymerase III subunit epsilon	ECO Butland
TP0062	ssb	single-strand DNA binding protein (ssb); K03111 single-strand DNA-binding protein	TP0669	dnaE	dnaE; DNA polymerase III subunit alpha [EC:2.7.7.7]; K02337 DNA polymerase III subunit alpha	ECO Butland
TP0062	ssb	single-strand DNA binding protein (ssb); K03111 single-strand DNA-binding protein	TP0704	RecJ	single-stranded-DNA-specific exonuclease (RecJ) [EC:3.1.-.-]; K07462 single-stranded-DNA-specific exonuclease	CJE Parrish
TP0062	ssb	single-strand DNA binding protein (ssb); K03111 single-strand DNA-binding protein	TP0704	RecJ	single-stranded-DNA-specific exonuclease (RecJ) [EC:3.1.-.-]; K07462 single-stranded-DNA-specific exonuclease	ECO Butland
TP0062	ssb	single-strand DNA binding protein (ssb); K03111 single-strand DNA-binding protein	TP1005	dnaH	DNA polymerase III subunits gamma and tau [EC:2.7.7.7]; K02343 DNA polymerase III subunit gamma/tau	HPY Rain
TP0067	TP0067	hypothetical protein	TP0526	hrpA	ATP-dependent helicase (HrpA)	TPA HCI		14
TP0067	TP0067	hypothetical protein	TP1005	dnaH	DNA polymerase III subunits gamma and tau [EC:2.7.7.7]; K02343 DNA polymerase III subunit gamma/tau	TPA HCI		15
TP0068	TP0068	hypothetical protein; K06941	TP1005	dnaH	DNA polymerase III subunits gamma and tau [EC:2.7.7.7]; K02343 DNA polymerase III subunit gamma/tau	TPA HCI		16
TP0102	Rep	rep helicase, single-stranded DNA-dependent ATPase (rep) [EC:3.6.1.-]; K03656 ATP-dependent DNA helicase Rep	TP0102	Rep	rep helicase, single-stranded DNA-dependent ATPase (rep) [EC:3.6.1.-]; K03656 ATP-dependent DNA helicase Rep	HPY Rain
TP0103	TP0103	ATP-dependent DNA helicase, putative [EC:3.6.1.-]; K03654 ATP-dependent DNA helicase RecQ	TP0394	topA	DNA topoisomerase I (TopA) [EC:5.99.1.2]; K03168 DNA topoisomerase I	ECO Butland
TP0103	TP0103	ATP-dependent DNA helicase, putative [EC:3.6.1.-]; K03654 ATP-dependent DNA helicase RecQ	TP0394	topA	DNA topoisomerase I (TopA) [EC:5.99.1.2]; K03168 DNA topoisomerase I	String DB
TP0103	TP0103	ATP-dependent DNA helicase, putative [EC:3.6.1.-]; K03654 ATP-dependent DNA helicase RecQ	TP1004	recR	recombination protein (RecR); K06187 recombination protein RecR	TPA HCI		17
TP0103	TP0103	ATP-dependent DNA helicase, putative [EC:3.6.1.-]; K03654 ATP-dependent DNA helicase RecQ	TP1004	recR	recombination protein (RecR); K06187 recombination protein RecR	String DB
TP0105	polA	DNA polymerase I (PolA) [EC:2.7.7.7]; K02335 DNA polymerase I	TP0251	hup	DNA-binding protein II	ECO Butland
TP0105	polA	DNA polymerase I (PolA) [EC:2.7.7.7]; K02335 DNA polymerase I	TP0396	FlgB	flagellar basal-body rod protein (FlgB); K02387 flagellar basal-body rod protein FlgB	HPY Rain
TP0105	polA	DNA polymerase I (PolA) [EC:2.7.7.7]; K02335 DNA polymerase I	TP0492	dnaG	DNA primase (DnaG) [EC:2.7.7.-]; K02316 DNA primase	BSU Noirot-Gros
TP0105	polA	DNA polymerase I (PolA) [EC:2.7.7.7]; K02335 DNA polymerase I	TP0643	dnaQ	DNA polymerase III, subunit epsilon (DnaQ) [EC:2.7.7.7]; K02342 DNA polymerase III subunit epsilon	BSU Noirot-Gros
TP0116	uvrB	excinuclease ABC subunit B; K03702 excinuclease ABC subunit B	TP0116	uvrB	excinuclease ABC subunit B; K03702 excinuclease ABC subunit B	CJE Parrish
TP0116	uvrB	excinuclease ABC subunit B; K03702 excinuclease ABC subunit B	TP0472	uvrC	excinuclease ABC, subunit C (UvrC); K03703 excinuclease ABC subunit C	HPY Rain
TP0116	uvrB	excinuclease ABC subunit B; K03702 excinuclease ABC subunit B	TP0472	uvrC	excinuclease ABC, subunit C (UvrC); K03703 excinuclease ABC subunit C	CJE Parrish
TP0116	uvrB	excinuclease ABC subunit B; K03702 excinuclease ABC subunit B	TP0472	uvrC	excinuclease ABC, subunit C (UvrC); K03703 excinuclease ABC subunit C	String DB
TP0116	uvrB	excinuclease ABC subunit B; K03702 excinuclease ABC subunit B	TP0514	uvrA	excinuclease ABC, subunit A (UvrA); K03701 excinuclease ABC subunit A	HPY Rain
TP0116	uvrB	excinuclease ABC subunit B; K03702 excinuclease ABC subunit B	TP0514	uvrA	excinuclease ABC, subunit A (UvrA); K03701 excinuclease ABC subunit A	String DB
TP0160	proS	prolyl-tRNA synthetase [EC:6.1.1.15]; K01881 prolyl-tRNA synthetase	TP0588	TP0588	hypothetical protein [EC:2.7.7.7]; K02340 DNA polymerase III subunit delta	TPA HCI		18
TP0160	proS	prolyl-tRNA synthetase [EC:6.1.1.15]; K01881 prolyl-tRNA synthetase	TP0704	RecJ	single-stranded-DNA-specific exonuclease (RecJ) [EC:3.1.-.-]; K07462 single-stranded-DNA-specific exonuclease	ECO Arifuzzaman
TP0160	proS	prolyl-tRNA synthetase [EC:6.1.1.15]; K01881 prolyl-tRNA synthetase	TP0946	gidB	glucose-inhibited division protein B (GidB) [EC:2.1.-.-]; K03501 glucose inhibited division protein B	TPA HCI		19
TP0162	ruvB	ruvB; Holliday junction DNA helicase B; K03551 holliday junction DNA helicase RuvB	TP0162	ruvB	ruvB; Holliday junction DNA helicase B; K03551 holliday junction DNA helicase RuvB	CJE Parrish
TP0162	ruvB	ruvB; Holliday junction DNA helicase B; K03551 holliday junction DNA helicase RuvB	TP0543	ruvA	Holliday junction DNA helicase (RuvA); K03550 holliday junction DNA helicase RuvA	TPA HCI		20
TP0162	ruvB	ruvB; Holliday junction DNA helicase B; K03551 holliday junction DNA helicase RuvB	TP0543	ruvA	Holliday junction DNA helicase (RuvA); K03550 holliday junction DNA helicase RuvA	CJE Parrish
TP0162	ruvB	ruvB; Holliday junction DNA helicase B; K03551 holliday junction DNA helicase RuvB	TP0543	ruvA	Holliday junction DNA helicase (RuvA); K03550 holliday junction DNA helicase RuvA	String DB
TP0183	TP0183	hypothetical protein	TP0380	TP0380	DNA repair helicase, putative	TPA HCI		21
TP0183	TP0183	hypothetical protein	TP0626	TP0626	exonuclease, putative; K03547 exonuclease SbcD	TPA HCI		22
TP0212	rpoA	DNA-directed RNA polymerase subunit alpha [EC:2.7.7.6]; K03040 DNA-directed RNA polymerase subunit alpha	TP0251	hup	DNA-binding protein II	ECO Butland
TP0230	priA	primosomal protein N (PriA); K04066 primosomal protein N' (replication factor Y) (superfamily II helicase)	TP0999	ftsK	cell division protein, putative; K03466 DNA segregation ATPase FtsK/SpoIIIE, S-DNA-T family	ECO Arifuzzaman
TP0241	rpoB	rpoB; DNA-directed RNA polymerase subunit beta [EC:2.7.7.6]; K03043 DNA-directed RNA polymerase subunit beta	TP0344	TrcF	transcription-repair coupling factor (TrcF); K03723 transcription-repair coupling factor (superfamily II helicase)	HPY Rain
TP0241	rpoB	rpoB; DNA-directed RNA polymerase subunit beta [EC:2.7.7.6]; K03043 DNA-directed RNA polymerase subunit beta	TP0344	TrcF	transcription-repair coupling factor (TrcF); K03723 transcription-repair coupling factor (superfamily II helicase)	String DB
TP0251	hup	DNA-binding protein II	TP0251	hup	DNA-binding protein II	ECO Butland
TP0251	hup	DNA-binding protein II	TP0344	TrcF	transcription-repair coupling factor (TrcF); K03723 transcription-repair coupling factor (superfamily II helicase)	ECO Arifuzzaman
TP0251	hup	DNA-binding protein II	TP0519	AtoC	response regulatory protein (AtoC); K02481 two-component system, NtrC family, response regulator	CJE Parrish
TP0251	hup	DNA-binding protein II	TP0637	miaA	miaA; tRNA delta(2)-isopentenylpyrophosphate transferase [EC:2.5.1.8]; K00791 tRNA delta(2)-isopentenylpyrophosphate transferase	CJE Parrish
TP0251	hup	DNA-binding protein II	TP0669	dnaE	dnaE; DNA polymerase III subunit alpha [EC:2.7.7.7]; K02337 DNA polymerase III subunit alpha	CJE Parrish
TP0251	hup	DNA-binding protein II	TP0892	TP0892	nusA; transcription elongation factor NusA; K02600 N utilization substance protein A	CJE Parrish
TP0251	hup	DNA-binding protein II	TP0898	TP0898	ATP-dependent nuclease, subunit A, putative; K01529	CJE Parrish
TP0303	mutL	DNA mismatch repair protein (MutL); K03572 DNA mismatch repair protein MutL	TP0353	rnhA	ribonuclease H (RnhA) [EC:3.1.26.4]; K03469 ribonuclease HI	ECO Arifuzzaman
TP0303	mutL	DNA mismatch repair protein (MutL); K03572 DNA mismatch repair protein MutL	TP0508	clpX	clpX; ATP-dependent protease ATP-binding subunit; K03544 ATP-dependent Clp protease ATP-binding subunit ClpX	ECO Arifuzzaman
TP0303	mutL	DNA mismatch repair protein (MutL); K03572 DNA mismatch repair protein MutL	TP0508	clpX	clpX; ATP-dependent protease ATP-binding subunit; K03544 ATP-dependent Clp protease ATP-binding subunit ClpX	String DB
TP0309	TP0309	amino acid ABC transporter, periplasmic binding protein; K02030 polar amino acid transport system substrate-binding protein	TP0775	nth	endonuclease III (nth) [EC:4.2.99.18]; K01741 DNA-(apurinic or apyrimidinic site) lyase	CJE Parrish
TP0328	mutS	DNA mismatch repair protein; K03555 DNA mismatch repair protein MutS	TP0396	FlgB	flagellar basal-body rod protein (FlgB); K02387 flagellar basal-body rod protein FlgB	HPY Rain
TP0328	mutS	DNA mismatch repair protein; K03555 DNA mismatch repair protein MutS	TP0946	gidB	glucose-inhibited division protein B (GidB) [EC:2.1.-.-]; K03501 glucose inhibited division protein B	TPA HCI		23
TP0344	TrcF	transcription-repair coupling factor (TrcF); K03723 transcription-repair coupling factor (superfamily II helicase)	TP0410	secD	secD; preprotein translocase subunit SecD; K03072 preprotein translocase SecD subunit	ECO Butland
TP0344	TrcF	transcription-repair coupling factor (TrcF); K03723 transcription-repair coupling factor (superfamily II helicase)	TP0410	secD	secD; preprotein translocase subunit SecD; K03072 preprotein translocase SecD subunit	String DB
TP0344	TrcF	transcription-repair coupling factor (TrcF); K03723 transcription-repair coupling factor (superfamily II helicase)	TP0492	dnaG	DNA primase (DnaG) [EC:2.7.7.-]; K02316 DNA primase	ECO Arifuzzaman
TP0344	TrcF	transcription-repair coupling factor (TrcF); K03723 transcription-repair coupling factor (superfamily II helicase)	TP0493	rpoD	RNA polymerase sigma factor RpoD; K03086 RNA polymerase primary sigma factor	ECO Arifuzzaman
TP0344	TrcF	transcription-repair coupling factor (TrcF); K03723 transcription-repair coupling factor (superfamily II helicase)	TP0514	uvrA	excinuclease ABC, subunit A (UvrA); K03701 excinuclease ABC subunit A	TPA HCI		24
TP0344	TrcF	transcription-repair coupling factor (TrcF); K03723 transcription-repair coupling factor (superfamily II helicase)	TP0514	uvrA	excinuclease ABC, subunit A (UvrA); K03701 excinuclease ABC subunit A	HPY Rain
TP0344	TrcF	transcription-repair coupling factor (TrcF); K03723 transcription-repair coupling factor (superfamily II helicase)	TP0514	uvrA	excinuclease ABC, subunit A (UvrA); K03701 excinuclease ABC subunit A	String DB
TP0353	rnhA	ribonuclease H (RnhA) [EC:3.1.26.4]; K03469 ribonuclease HI	TP0704	RecJ	single-stranded-DNA-specific exonuclease (RecJ) [EC:3.1.-.-]; K07462 single-stranded-DNA-specific exonuclease	ECO Butland
TP0353	rnhA	ribonuclease H (RnhA) [EC:3.1.26.4]; K03469 ribonuclease HI	TP0704	RecJ	single-stranded-DNA-specific exonuclease (RecJ) [EC:3.1.-.-]; K07462 single-stranded-DNA-specific exonuclease	String DB
TP0380	TP0380	DNA repair helicase, putative	TP0389	FtsA	cell division protein (FtsA); K03590 cell division protein FtsA	TPA HCI		25
TP0390	ftsZ	cell division protein FtsZ; K03531 cell division protein FtsZ	TP0692	recA	RecA protein (RecA); K03553 recombination protein RecA	ECO Butland
TP0390	ftsZ	cell division protein FtsZ; K03531 cell division protein FtsZ	TP0692	recA	RecA protein (RecA); K03553 recombination protein RecA	String DB
TP0391	TP0391 (CodV)	integrase/recombinase (CodV); K04763 integrase/recombinase XerD	TP0408	TP0408	hypothetical protein	ECO Butland
TP0393	Smf	smf protein (smf); K04096 DNA processing protein	TP0393	Smf	smf protein (smf); K04096 DNA processing protein	CJE Parrish
TP0394	topA	DNA topoisomerase I (TopA) [EC:5.99.1.2]; K03168 DNA topoisomerase I	TP0396	FlgB	flagellar basal-body rod protein (FlgB); K02387 flagellar basal-body rod protein FlgB	HPY Rain
TP0394	topA	DNA topoisomerase I (TopA) [EC:5.99.1.2]; K03168 DNA topoisomerase I	TP0396	FlgB	flagellar basal-body rod protein (FlgB); K02387 flagellar basal-body rod protein FlgB	String DB
TP0394	topA	DNA topoisomerase I (TopA) [EC:5.99.1.2]; K03168 DNA topoisomerase I	TP0704	RecJ	single-stranded-DNA-specific exonuclease (RecJ) [EC:3.1.-.-]; K07462 single-stranded-DNA-specific exonuclease	ECO Butland
TP0394	topA	DNA topoisomerase I (TopA) [EC:5.99.1.2]; K03168 DNA topoisomerase I	TP0838	TP0838	ABC transporter, ATP-binding protein	ECO Butland
TP0394	topA	DNA topoisomerase I (TopA) [EC:5.99.1.2]; K03168 DNA topoisomerase I	TP0838	TP0838	ABC transporter, ATP-binding protein	String DB
TP0395	TP0395 (XprB)	integrase/recombinase (XprB)	TP0408	TP0408	hypothetical protein	ECO Butland
TP0396	FlgB	flagellar basal-body rod protein (FlgB); K02387 flagellar basal-body rod protein FlgB	TP0408	TP0408	hypothetical protein	HPY Rain
TP0396	FlgB	flagellar basal-body rod protein (FlgB); K02387 flagellar basal-body rod protein FlgB	TP0442	recN	DNA repair protein (RecN); K03631 DNA repair protein RecN (Recombination protein N)	HPY Rain
TP0396	FlgB	flagellar basal-body rod protein (FlgB); K02387 flagellar basal-body rod protein FlgB	TP0634	ligA	DNA ligase (lig)	HPY Rain
TP0397	FlgC	flgC; flagellar basal body rod protein FlgC; K02388 flagellar basal-body rod protein FlgC	TP0517	ruvC	Holliday junction nuclease (RuvC) [EC:3.1.22.4]; K01159 crossover junction endodeoxyribonuclease	TPA HCI		26
TP0397	FlgC	flgC; flagellar basal body rod protein FlgC; K02388 flagellar basal-body rod protein FlgC	TP0643	dnaQ	DNA polymerase III, subunit epsilon (DnaQ) [EC:2.7.7.7]; K02342 DNA polymerase III subunit epsilon	TPA HCI		27
TP0443	TP0443	hypothetical protein	TP0946	gidB	glucose-inhibited division protein B (GidB) [EC:2.1.-.-]; K03501 glucose inhibited division protein B	TPA HCI		28
TP0443	TP0443	hypothetical protein	TP1023	recX	recX; recombination regulator RecX; K03565 regulatory protein	TPA HCI		29
TP0472	uvrC	excinuclease ABC, subunit C (UvrC); K03703 excinuclease ABC subunit C	TP0472	uvrC	excinuclease ABC, subunit C (UvrC); K03703 excinuclease ABC subunit C	HPY Rain
TP0472	uvrC	excinuclease ABC, subunit C (UvrC); K03703 excinuclease ABC subunit C	TP0514	uvrA	excinuclease ABC, subunit A (UvrA); K03701 excinuclease ABC subunit A	HPY Rain
TP0472	uvrC	excinuclease ABC, subunit C (UvrC); K03703 excinuclease ABC subunit C	TP0514	uvrA	excinuclease ABC, subunit A (UvrA); K03701 excinuclease ABC subunit A	String DB
TP0472	uvrC	excinuclease ABC, subunit C (UvrC); K03703 excinuclease ABC subunit C	TP1004	recR	recombination protein (RecR); K06187 recombination protein RecR	TPA HCI		30
TP0492	dnaG	DNA primase (DnaG) [EC:2.7.7.-]; K02316 DNA primase	TP0492	dnaG	DNA primase (DnaG) [EC:2.7.7.-]; K02316 DNA primase	BSU Noirot-Gros
TP0492	dnaG	DNA primase (DnaG) [EC:2.7.7.-]; K02316 DNA primase	TP0493	rpoD	RNA polymerase sigma factor RpoD; K03086 RNA polymerase primary sigma factor	ECO Arifuzzaman
TP0492	dnaG	DNA primase (DnaG) [EC:2.7.7.-]; K02316 DNA primase	TP0493	rpoD	RNA polymerase sigma factor RpoD; K03086 RNA polymerase primary sigma factor	String DB
TP0492	dnaG	DNA primase (DnaG) [EC:2.7.7.-]; K02316 DNA primase	TP1006	gyrB	DNA gyrase, subunit B (GyrB) [EC:5.99.1.3]; K02470 DNA gyrase subunit B	TPA HCI		31
TP0497	MreB	rod shape-determining protein (MreB); K03569 rod shape-determining protein MreB and related proteins	TP0692	recA	RecA protein (RecA); K03553 recombination protein RecA	ECO Butland
TP0497	MreB	rod shape-determining protein (MreB); K03569 rod shape-determining protein MreB and related proteins	TP0692	recA	RecA protein (RecA); K03553 recombination protein RecA	String DB
TP0497	MreB	rod shape-determining protein (MreB); K03569 rod shape-determining protein MreB and related proteins	TP1022	radA	DNA repair protein RadA; K04485 DNA repair protein RadA/Sms	ECO Butland
TP0497	MreB	rod shape-determining protein (MreB); K03569 rod shape-determining protein MreB and related proteins	TP1022	radA	DNA repair protein RadA; K04485 DNA repair protein RadA/Sms	String DB
TP0514	uvrA	excinuclease ABC, subunit A (UvrA); K03701 excinuclease ABC subunit A	TP0634	ligA	DNA ligase (lig)	TPA HCI		32
TP0514	uvrA	excinuclease ABC, subunit A (UvrA); K03701 excinuclease ABC subunit A	TP0946	gidB	glucose-inhibited division protein B (GidB) [EC:2.1.-.-]; K03501 glucose inhibited division protein B	TPA HCI		33
TP0517	ruvC	Holliday junction nuclease (RuvC) [EC:3.1.22.4]; K01159 crossover junction endodeoxyribonuclease	TP0704	RecJ	single-stranded-DNA-specific exonuclease (RecJ) [EC:3.1.-.-]; K07462 single-stranded-DNA-specific exonuclease	TPA HCI		34
TP0526	hrpA	ATP-dependent helicase (HrpA)	TP0892	TP0892	nusA; transcription elongation factor NusA; K02600 N utilization substance protein A	TPA HCI		35
TP0526	hrpA	ATP-dependent helicase (HrpA)	TP1023	recX	recX; recombination regulator RecX; K03565 regulatory protein	TPA HCI		36
TP0543	ruvA	Holliday junction DNA helicase (RuvA); K03550 holliday junction DNA helicase RuvA	TP0543	ruvA	Holliday junction DNA helicase (RuvA); K03550 holliday junction DNA helicase RuvA	CJE Parrish
TP0543	ruvA	Holliday junction DNA helicase (RuvA); K03550 holliday junction DNA helicase RuvA	TP0704	RecJ	single-stranded-DNA-specific exonuclease (RecJ) [EC:3.1.-.-]; K07462 single-stranded-DNA-specific exonuclease	ECO Butland
TP0543	ruvA	Holliday junction DNA helicase (RuvA); K03550 holliday junction DNA helicase RuvA	TP0704	RecJ	single-stranded-DNA-specific exonuclease (RecJ) [EC:3.1.-.-]; K07462 single-stranded-DNA-specific exonuclease	String DB
TP0586	leuS	leuS; leucyl-tRNA synthetase [EC:6.1.1.4]; K01869 leucyl-tRNA synthetase	TP0634	ligA	DNA ligase (lig)	ECO Butland
TP0586	leuS	leuS; leucyl-tRNA synthetase [EC:6.1.1.4]; K01869 leucyl-tRNA synthetase	TP0634	ligA	DNA ligase (lig)	String DB
TP0588	TP0588	hypothetical protein [EC:2.7.7.7]; K02340 DNA polymerase III subunit delta	TP0948	Jag	spoIIIJ-associated protein (jag); K06346 spoIIIJ-associated protein	TPA HCI		37
TP0634	ligA	DNA ligase (lig)	TP0757	def	polypeptide deformylase (def) [EC:3.5.1.88]; K01462	TPA HCI		38
TP0634	ligA	DNA ligase (lig)	TP0919	trxA	thioredoxin (trx); K03671 thioredoxin 1	CJE Parrish
TP0643	dnaQ	DNA polymerase III, subunit epsilon (DnaQ) [EC:2.7.7.7]; K02342 DNA polymerase III subunit epsilon	TP0669	dnaE	dnaE; DNA polymerase III subunit alpha [EC:2.7.7.7]; K02337 DNA polymerase III subunit alpha	ECO Butland
TP0643	dnaQ	DNA polymerase III, subunit epsilon (DnaQ) [EC:2.7.7.7]; K02342 DNA polymerase III subunit epsilon	TP0669	dnaE	dnaE; DNA polymerase III subunit alpha [EC:2.7.7.7]; K02337 DNA polymerase III subunit alpha	String DB
TP0643	dnaQ	DNA polymerase III, subunit epsilon (DnaQ) [EC:2.7.7.7]; K02342 DNA polymerase III subunit epsilon	TP1005	dnaH	DNA polymerase III subunits gamma and tau [EC:2.7.7.7]; K02343 DNA polymerase III subunit gamma/tau	ECO Butland
TP0643	dnaQ	DNA polymerase III, subunit epsilon (DnaQ) [EC:2.7.7.7]; K02342 DNA polymerase III subunit epsilon	TP1005	dnaH	DNA polymerase III subunits gamma and tau [EC:2.7.7.7]; K02343 DNA polymerase III subunit gamma/tau	BSU Noirot-Gros
TP0643	dnaQ	DNA polymerase III, subunit epsilon (DnaQ) [EC:2.7.7.7]; K02342 DNA polymerase III subunit epsilon	TP1005	dnaH	DNA polymerase III subunits gamma and tau [EC:2.7.7.7]; K02343 DNA polymerase III subunit gamma/tau	String DB
TP0669	dnaE	dnaE; DNA polymerase III subunit alpha [EC:2.7.7.7]; K02337 DNA polymerase III subunit alpha	TP1005	dnaH	DNA polymerase III subunits gamma and tau [EC:2.7.7.7]; K02343 DNA polymerase III subunit gamma/tau	ECO Butland
TP0669	dnaE	dnaE; DNA polymerase III subunit alpha [EC:2.7.7.7]; K02337 DNA polymerase III subunit alpha	TP1005	dnaH	DNA polymerase III subunits gamma and tau [EC:2.7.7.7]; K02343 DNA polymerase III subunit gamma/tau	String DB
TP0704	RecJ	single-stranded-DNA-specific exonuclease (RecJ) [EC:3.1.-.-]; K07462 single-stranded-DNA-specific exonuclease	TP0819	rnz	ribonuclease Z [EC:3.1.26.11]; K00784 ribonuclease Z	TPA HCI		39
TP0704	RecJ	single-stranded-DNA-specific exonuclease (RecJ) [EC:3.1.-.-]; K07462 single-stranded-DNA-specific exonuclease	TP0819	rnz	ribonuclease Z [EC:3.1.26.11]; K00784 ribonuclease Z	String DB
TP0704	RecJ	single-stranded-DNA-specific exonuclease (RecJ) [EC:3.1.-.-]; K07462 single-stranded-DNA-specific exonuclease	TP0912	TP0912	hypothetical protein	TPA HCI		40
TP0754	TP0754	hypothetical protein	TP1022	radA	DNA repair protein RadA; K04485 DNA repair protein RadA/Sms	ECO Butland
TP0754	TP0754	hypothetical protein	TP1022	radA	DNA repair protein RadA; K04485 DNA repair protein RadA/Sms	String DB
TP0770	TP0770	ATP-dependent RNA helicase	TP0770	TP0770	ATP-dependent RNA helicase	HPY Rain
TP0775	nth	endonuclease III (nth) [EC:4.2.99.18]; K01741 DNA-(apurinic or apyrimidinic site) lyase	TP0975	TP0975	hypothetical protein; K07056	CJE Parrish
TP0984	htpG	heat shock protein 90; K04079 molecular chaperone HtpG	TP1004	recR	recombination protein (RecR); K06187 recombination protein RecR	TPA HCI		41
TP0984	htpG	heat shock protein 90; K04079 molecular chaperone HtpG	TP1004	recR	recombination protein (RecR); K06187 recombination protein RecR	String DB
TP1004	recR	recombination protein (RecR); K06187 recombination protein RecR	TP1004	recR	recombination protein (RecR); K06187 recombination protein RecR	CJE Parrish
TP1005	dnaH	DNA polymerase III subunits gamma and tau [EC:2.7.7.7]; K02343 DNA polymerase III subunit gamma/tau	TP1005	dnaH	DNA polymerase III subunits gamma and tau [EC:2.7.7.7]; K02343 DNA polymerase III subunit gamma/tau	TPA HCI		42
TP1005	dnaH	DNA polymerase III subunits gamma and tau [EC:2.7.7.7]; K02343 DNA polymerase III subunit gamma/tau	TP1005	dnaH	DNA polymerase III subunits gamma and tau [EC:2.7.7.7]; K02343 DNA polymerase III subunit gamma/tau	CJE Parrish
TP1005	dnaH	DNA polymerase III subunits gamma and tau [EC:2.7.7.7]; K02343 DNA polymerase III subunit gamma/tau	TP1005	dnaH	DNA polymerase III subunits gamma and tau [EC:2.7.7.7]; K02343 DNA polymerase III subunit gamma/tau	BSU Noirot-Gros
