# Supplementary material for: The Binary Protein Interactome of Treponema pallidum – The Syphilis Spirochete
Source: PLoS One. 2008 May 28;3(5):e2292. doi: 10.1371/journal.pone.0002292 (PMC2386257; doi:10.1371/journal.pone.0002292)
Supplement: Table S4 — Summary table for the predicted interactions showing all species, their phylogenetic relationships, and the number of predicted interactions for each species. (2.00 MB XLS) [file pone.0002292.s004.xls]

## Sheet: overview
The protein interaction map of T. pallidum - a minimal proteome
Supplementary Information Predictions
Phlogenetic distribution and interactions space coverage of 417.329 predicted interactions
	Tables	Information
	372 genomes	overview of 372 sequenced genomes (including strains); number of interologs; interaction space coverage
	179 selected genomes	phylogenetic tree of 179 genomes (including strains); number of interologs; interaction space coverage
	147 selected genomes	phylogenetic tree of 149 genomes (without strains); number of interologs; interaction space coverage
	77 selected genomes	phylogenetic tree of 77 genomes; number of interologs; interaction space coverage
		source STRING DB v.3.0 & v.7.0

## Sheet: 372 genomes
Titz et al., Supplementary Table S4: predicted interactions in 372 genomes
ncbi tax id	species		# predicted PPIs (STRING orthology)	# proteins	possible interactions	percentage of predicted vs. possible interactions		possible interactions refers to all possible combinations in a genome.
204669	Acidobacterium sp. Ellin345	BACTERIA	3237	4777	11412253	0.000283643		For example, Acidobacterium has 4777 proteins and thus 4777 x 4777 possible combinations.
62977	Acinetobacter sp. ADP1		864	3323	5522826	0.000156442
176299	Agrobacterium tumefaciens		2982	5314	14121955	0.000211161
240292	Anabaena variabilis		3297	5039	12698280	0.000259641
290397	Anaeromyxobacter dehalogenans		4271	4346	9446031	0.000452148
234826	Anaplasma marginale		181	949	450775	0.000401531
212042	Anaplasma phagocytophilum		151	1264	799480	0.000188873
224324	Aquifex aeolicus		822	1551	1203576	0.000682965
322098	Aster yellows phytoplasma		151	671	225456	0.000669754
76114	Azoarcus sp. EbN1		1297	4594	10554715	0.000122883
261594	Bacillus anthracis 0581		1737	5621	15800631	0.000109932
198094	Bacillus anthracis Porton		1669	5309	14095395	0.000118407
260799	Bacillus anthracis Sterne		2040	5288	13984116	0.00014588
222523	Bacillus cereus 10987		1858	5603	15699606	0.000118347
226900	Bacillus cereus 14579		2176	5253	13799631	0.000157685
288681	Bacillus cereus E33L		1909	5134	13181545	0.000144824
66692	Bacillus clausii		2349	4108	8439886	0.000278321
272558	Bacillus halodurans		2279	4065	8264145	0.00027577
279010	Bacillus licheniformis		2333	4195	8801110	0.00026508
224308	Bacillus subtilis		2147	4106	8431671	0.000254635
281309	Bacillus thuringiensis		1908	5117	13094403	0.000145711
272559	Bacteroides fragilis 9343		2271	4231	8952796	0.000253664
295405	Bacteroides fragilis YCH46		2255	4612	10637578	0.000211984
226186	Bacteroides thetaiotaomicron		1757	4814	11589705	0.0001516
38323	Bartonella henselae		377	1487	1106328	0.000340767
283165	Bartonella quintana		321	1142	652653	0.000491839
374463	Baumannia cicadellinicola		109	595	177310	0.000614743
959	Bdellovibrio bacteriovorus		1326	3583	6420736	0.000206518
206672	Bifidobacterium longum		242	1729	1495585	0.00016181
203907	Blochmannia floridanus		91	583	170236	0.000534552
291272	Blochmannia pennsylvanicus		108	610	186355	0.000579539
518	Bordetella bronchiseptica		1364	4994	12472515	0.00010936
257311	Bordetella parapertussis 12822		1229	4186	8763391	0.000140243
520	Bordetella pertussis		921	3449	5949525	0.000154802
224326	Borrelia burgdorferi		965	1637	1340703	0.000719772
290434	Borrelia garinii		849	928	431056	0.00196958
224911	Bradyrhizobium japonicum		7868	8314	34565455	0.000227626
262698	Brucella abortus		892	3074	4726275	0.000188732
224914	Brucella melitensis 16M		1145	3192	5096028	0.000224685
235	Brucella melitensis abortus		884	3034	4604095	0.000192003
204722	Brucella suis		995	3273	5357901	0.000185707
107806	Buchnera aphidicola APS		123	573	164451	0.000747943
224915	Buchnera aphidicola Bp		97	507	128778	0.000753234
198804	Buchnera aphidicola Sg		122	561	157641	0.00077391
243160	Burkholderia mallei		2211	5023	12617776	0.000175229
320372	Burkholderia pseudomallei 1710b		3467	6347	20145378	0.000172099
272560	Burkholderia pseudomallei K96243		3556	5729	16413585	0.00021665
269483	Burkholderia sp. 383		5530	7717	29779903	0.000185696
271848	Burkholderia thailandensis		3380	5634	15873795	0.00021293
266265	Burkholderia xenovorans		7004	8702	37866753	0.000184964
192222	Campylobacter jejuni 11168		611	1633	1334161	0.000457966
195099	Campylobacter jejuni RM1221		612	1838	1690041	0.000362121
246194	Carboxydothermus hydrogenoform.		650	2620	3433510	0.000189311
190650	Caulobacter crescentus		1595	3738	6988191	0.000228242
243161	Chlamydia muridarum		346	916	419986	0.000823837
315277	Chlamydia trachomatis A/HAR-13		350	911	415416	0.000842529
272561	Chlamydia trachomatis D/UW-3/CX		351	894	400065	0.000877357
218497	Chlamydophila abortus		393	932	434778	0.00090391
227941	Chlamydophila caviae		388	1005	505515	0.000767534
264202	Chlamydophila felis		395	1005	505515	0.000781381
115711	Chlamydophila pneum. AR39		386	1110	616605	0.000626009
115713	Chlamydophila pneum. CWL029		388	1053	554931	0.000699186
138677	Chlamydophila pneum. J138		388	1070	572985	0.000677156
182082	Chlamydophila pneum. TW-183		388	1112	618828	0.000626992
340177	Chlorobium chlorochromatii		715	2002	2005003	0.000356608
194439	Chlorobium tepidum		535	2254	2541385	0.000210515
243365	Chromobacterium violaceum		2784	4407	9713028	0.000286625
290398	Chromohalobacter salexigens		1063	3298	5440051	0.000195403
272562	Clostridium acetobutylicum		3186	3847	7401628	0.000430446
195102	Clostridium perfringens		763	2722	3706003	0.000205882
212717	Clostridium tetani		902	2429	2951235	0.000305635
167879	Colwellia psychrerythraea		2413	4900	12007450	0.000200959
257309	Corynebacterium diphtheriae		310	2271	2579856	0.000120162
196164	Corynebacterium efficiens		400	2998	4495501	8.89778e-05
196627	Corynebacterium glutamicum		439	3056	4671096	9.39822e-05
306537	Corynebacterium jeikeium		308	2120	2248260	0.000136995
227377	Coxiella burnetii		438	2050	2102275	0.000208346
331114	Cyanobacterium Yellowstone A		769	2769	3835065	0.000200518
331115	Cyanobacterium Yellowstone B		779	2859	4088370	0.00019054
159087	Dechloromonas aromatica		2178	4171	8700706	0.000250325
243164	Dehalococcoides ethenogenes		193	1580	1248990	0.000154525
255470	Dehalococcoides sp. CBDB1		172	1458	1063611	0.000161713
319795	Deinococcus geothermalis		624	2335	2727280	0.000228799
243230	Deinococcus radiodurans		789	3101	4809651	0.000164045
138119	Desulfitobacterium hafniense		2227	5060	12804330	0.000173926
177439	Desulfotalea psychrophila		1221	3233	5227761	0.000233561
207559	Desulfovibrio desulfuricans		2611	3775	7127200	0.000366343
882	Desulfovibrio vulgaris		2862	3531	6235746	0.000458967
269484	Ehrlichia canis		145	925	428275	0.000338568
302409	Ehrlichia ruminantium Gardel		161	949	450775	0.000357163
254945	Ehrlichia ruminantium Welgev.		142	887	393828	0.000360563
226185	Enterococcus faecalis		491	3263	5325216	9.22028e-05
218491	Erwinia carotovora		1892	4471	9997156	0.000189254
314225	Erythrobacter litoralis		624	3011	4534566	0.00013761
199310	Escherichia coli CFT073		1879	5379	14469510	0.000129859
83333	Escherichia coli K12		1599	4379	9590010	0.000166736
83334	Escherichia coli O157H7		2076	5447	14837628	0.000139915
155864	Escherichia coli O157H7 EDL933		2114	5438	14788641	0.000142948
217992	Escherichia coli O6		1881	5380	14474890	0.000129949
364106	Escherichia coli UTI89		1727	5066	12834711	0.000134557
316407	Escherichia coli W3110		1581	4161	8659041	0.000182584
177416	Francisella tularensis SCHU S4		206	1561	1219141	0.000168971
119857	Francisella tularensis holarctica		267	1754	1539135	0.000173474
106370	Frankia sp. CcI3		486	4499	10122750	4.80107e-05
190304	Fusobacterium nucleatum		884	2064	2131080	0.000414813
235909	Geobacillus kaustophilus		1039	3539	6264030	0.000165868
269799	Geobacter metallireducens		2281	3519	6193440	0.000368293
243231	Geobacter sulfurreducens		2530	3446	5939181	0.000425985
251221	Gloeobacter violaceus		2079	4427	9801378	0.000212113
290633	Gluconobacter oxydans		774	2660	3539130	0.000218698
233412	Haemophilus ducreyi		340	1713	1468041	0.000231601
281310	Haemophilus influenzae 86-028NP		289	1791	1604736	0.000180092
71421	Haemophilus influenzae Rd KW20		292	1702	1449253	0.000201483
349521	Hahella chejuensis		3537	6778	22974031	0.000153956
235279	Helicobacter hepaticus		558	1875	1758750	0.000317271
85962	Helicobacter pylori 26695		479	1564	1223830	0.000391394
85963	Helicobacter pylori J99		458	1491	1112286	0.000411765
283942	Idiomarina loihiensis		867	2627	3451878	0.000251168
290400	Jannaschia sp. CCS1		1140	4212	8872578	0.000128486
272621	Lactobacillus acidophilus		284	1862	1734453	0.00016374
257314	Lactobacillus johnsonii		294	1818	1653471	0.000177808
220668	Lactobacillus plantarum		394	3009	4528545	8.70037e-05
314315	Lactobacillus sakei		357	1883	1773786	0.000201264
362948	Lactobacillus salivarius		360	1717	1474903	0.000244084
272623	Lactococcus lactis		349	2266	2568511	0.000135876
363253	Lawsonia intracellularis		509	1185	702705	0.000724344
297245	Legionella pneumophila Lens		879	2877	4140003	0.000212319
297246	Legionella pneumophila Paris		1004	3026	4579851	0.000219221
272624	Legionella pneumophila Philad.		964	2941	4326211	0.000222828
281090	Leifsonia xyli		308	2027	2055378	0.000149851
267671	Leptospira interrogans Copenh.		1195	3659	6695970	0.000178466
189518	Leptospira interrogans Lai		1197	4723	11155726	0.000107299
272626	Listeria innocua		977	3044	4634490	0.000210811
169963	Listeria monocytogenes EGD-e		863	2846	4051281	0.000213019
265669	Listeria monocytogenes F2365		862	2820	3977610	0.000216713
342108	Magnetospirillum magneticum		1994	4559	10394520	0.000191832
221988	Mannheimia succiniciproducens		418	2383	2840536	0.000147155
265311	Mesoplasma florum		86	683	233586	0.000368173
266835	Mesorhizobium loti		4314	7276	26473726	0.000162954
265072	Methylobacillus flagellatus		1061	2753	3790881	0.000279882
243233	Methylococcus capsulatus		978	2959	4379320	0.000223322
264732	Moorella thermoacetica		847	2465	3039345	0.000278678
83331	Mycobact. tuberculosis CDC1551		375	4207	8851528	4.23656e-05
83332	Mycobact. tuberculosis H37Rv		370	3984	7938120	4.66105e-05
262316	Mycobacterium avium		409	4349	9459075	4.32389e-05
233413	Mycobacterium bovis		378	3919	7681240	4.92108e-05
272631	Mycobacterium leprae TN		191	1607	1292028	0.00014783
340047	Mycoplasma capricolum		83	812	330078	0.000251456
233150	Mycoplasma gallisepticum		95	727	264628	0.000358995
243273	Mycoplasma genitalium		86	472	111628	0.000770416
295358	Mycoplasma hyopneumoniae 232		68	691	239086	0.000284416
262722	Mycoplasma hyopneumoniae 7448		72	663	220116	0.0003271
262719	Mycoplasma hyopneumoniae J		71	665	221445	0.000320621
267748	Mycoplasma mobile		90	628	197506	0.000455682
272632	Mycoplasma mycoides		73	1015	515620	0.000141577
272633	Mycoplasma penetrans		89	1036	537166	0.000165684
272634	Mycoplasma pneumoniae		92	687	236328	0.000389289
272635	Mycoplasma pulmonis		101	782	306153	0.0003299
262723	Mycoplasma synoviae		86	672	226128	0.000380316
242231	Neisseria gonorrhoeae		320	1999	1999000	0.00016008
122586	Neisseria meningitidis MC58		409	2061	2124891	0.00019248
122587	Neisseria meningitidis Z2491		443	2063	2129016	0.000208077
222891	Neorickettsia sennetsu		105	932	434778	0.000241503
323097	Nitrobacter hamburgensis		1302	3804	7237110	0.000179906
323098	Nitrobacter winogradskyi		923	3122	4875003	0.000189333
323261	Nitrosococcus oceani		1201	2974	4423825	0.000271485
228410	Nitrosomonas europaea		926	2460	3027030	0.00030591
323848	Nitrosospira multiformis		1085	2757	3801903	0.000285383
247156	Nocardia farcinica		489	5936	17621016	2.7751e-05
103690	Nostoc sp. PCC7120		4414	6121	18736381	0.000235584
279238	Novosphingobium aromaticivorans		839	3324	5526150	0.000151824
221109	Oceanobacillus iheyensis		1234	3493	6102271	0.00020222
262768	Onion yellows phytoplasma		386	754	284635	0.00135612
272843	Pasteurella multocida		495	2015	2031120	0.000243708
335992	Pelagibacter ubique		249	1354	917335	0.000271438
338963	Pelobacter carbinolicus		1816	3118	4862521	0.000373469
319225	Pelodictyon luteolum		656	2083	2170486	0.000302236
74109	Photobacterium profundum		2844	5478	15006981	0.000189512
243265	Photorhabdus luminescens		1253	4680	10953540	0.000114392
296591	Polaromonas sp. JS666		1477	4817	11604153	0.000127282
242619	Porphyromonas gingivalis		440	1908	1821186	0.000241601
167539	Prochlorococcus marinus CCMP1375		292	1882	1771903	0.000164795
59919	Prochlorococcus marinus CCMP1986		295	1712	1466328	0.000201183
74546	Prochlorococcus marinus MIT9312		289	1809	1637145	0.000176527
74547	Prochlorococcus marinus MIT9313		749	2262	2559453	0.000292641
59920	Prochlorococcus marinus NATL2A		474	1890	1786995	0.00026525
267747	Propionibacterium acnes		282	2297	2639253	0.000106848
264201	Protochlamydia amoebophila		615	2030	2061465	0.000298332
326442	Pseudoalteromonas haloplanktis5		1455	3486	6077841	0.000239394
208964	Pseudomonas aeruginosa		3744	5568	15504096	0.000241485
220664	Pseudomonas fluorescens Pf5		4336	6137	18834453	0.000230216
205922	Pseudomonas fluorescens PfO1		3933	5736	16453716	0.000239034
160488	Pseudomonas putida		3543	5349	14308575	0.000247614
264730	Pseudomonas syringae 1448A		3012	5121	13114881	0.000229663
205918	Pseudomonas syringae B728a		3251	5089	12951505	0.000251013
223283	Pseudomonas syringae DC3000		2976	5606	15716421	0.000189356
259536	Psychrobacter arcticus		371	2120	2248260	0.000165017
335284	Psychrobacter cryohalolentis		468	2467	3044278	0.000153731
264198	Ralstonia eutropha		3817	6445	20772235	0.000183755
266264	Ralstonia metallidurans		1164	3601	6485401	0.00017948
267608	Ralstonia solanacearum		2705	5101	13012651	0.000207875
347834	Rhizobium etli		2122	4035	8142630	0.000260604
272943	Rhodobacter sphaeroides		1566	4126	8514001	0.000183932
338969	Rhodoferax ferrireducens		2073	4170	8696535	0.000238371
117	Rhodopirellula baltica		1250	7325	26831475	4.65871e-05
316056	Rhodopseudom. palustris BisB18		2686	4886	11938941	0.000224978
316057	Rhodopseudom. palustris BisB5		1735	4397	9669003	0.000179439
258594	Rhodopseudom. palustris CGA009		2441	4815	11594520	0.00021053
316058	Rhodopseudom. palustris HaA2		2310	4683	10967586	0.000210621
269796	Rhodospirillum rubrum		2615	3791	7187736	0.000363814
336407	Rickettsia bellii		362	1429	1021735	0.000354299
272944	Rickettsia conorii		384	1371	940506	0.000408291
315456	Rickettsia felis		628	1512	1143828	0.000549034
272947	Rickettsia prowazekii		220	834	348195	0.00063183
257363	Rickettsia typhi		220	838	351541	0.000625816
203122	Saccharophagus degradans		1634	4008	8034036	0.000203385
309807	Salinibacter ruber		885	2801	3924201	0.000225524
295319	Salmonella enterica 9150		1587	4091	8370186	0.000189602
321314	Salmonella enterica SCB67		1750	4663	10874116	0.000160933
209261	Salmonella enterica Ty2		1525	4349	9459075	0.000161221
601	Salmonella typhi CT18		1568	4758	11321661	0.000138496
99287	Salmonella typhimurium		1927	4533	10276311	0.000187519
318161	Shewanella denitrificans		1921	3754	7048135	0.000272554
211586	Shewanella oneidensis		1612	4777	11412253	0.000141252
300268	Shigella boydii		1058	4284	9178470	0.00011527
300267	Shigella dysenteriae		965	4497	10113753	9.54146e-05
198215	Shigella flexneri 2457T		902	4088	8357916	0.000107922
198214	Shigella flexneri 301		959	4454	9921285	9.66609e-05
300269	Shigella sonnei		1327	4460	9948030	0.000133393
246200	Silicibacter pomeroyi		1243	4251	9037626	0.000137536
292414	Silicibacter sp. TM1040		955	3030	4591965	0.000207972
266834	Sinorhizobium meliloti		3598	6204	19247910	0.000186929
343509	Sodalis glossinidius		769	2432	2958528	0.000259927
234267	Solibacter usitatus		8977	8098	32792851	0.000273749
317655	Sphingopyxis alaskensis		926	3165	5010195	0.000184823
93061	Staphylococcus aureus 8325		506	2892	4183278	0.000120958
93062	Staphylococcus aureus COL		465	2675	3579150	0.000129919
282458	Staphylococcus aureus MRSA252		450	2654	3523185	0.000127725
282459	Staphylococcus aureus MSSA476		510	2596	3370906	0.000151295
196620	Staphylococcus aureus MW2		512	2656	3528496	0.000145104
158878	Staphylococcus aureus Mu50		500	2732	3733278	0.000133931
158879	Staphylococcus aureus N315		508	2600	3381300	0.000150238
273036	Staphylococcus aureus RF122		446	2515	3163870	0.000140967
367830	Staphylococcus aureus USA300		466	2560	3278080	0.000142156
176280	Staphylococcus epidermidis 12228		507	2477	3069003	0.0001652
176279	Staphylococcus epidermidis RP62A		505	2519	3173940	0.000159108
279808	Staphylococcus haemolyticus		463	2676	3581826	0.000129264
342451	Staphylococcus saprophyticus		500	2408	2900436	0.000172388
208435	Streptococcus agalactiae 2603VR		330	2123	2254626	0.000146366
205921	Streptococcus agalactiae A909		315	1996	1993006	0.000158053
211110	Streptococcus agalactiae NEM316		331	2094	2193465	0.000150903
210007	Streptococcus mutans UA159		287	1958	1917861	0.000149646
171101	Streptococcus pneumoniae R6		325	2035	2071630	0.000156881
170187	Streptococcus pneumoniae TIGR4		327	2095	2195560	0.000148937
160490	Streptococcus pyogenes 700294		305	1697	1440753	0.000211695
370552	Streptococcus pyogenes MGAS10270		336	1987	1975078	0.00017012
286636	Streptococcus pyogenes MGAS10394		306	1886	1779441	0.000171964
370554	Streptococcus pyogenes MGAS10750		328	1979	1959210	0.000167414
370553	Streptococcus pyogenes MGAS2096		351	1898	1802151	0.000194767
198466	Streptococcus pyogenes MGAS315		330	1782	1588653	0.000207723
293653	Streptococcus pyogenes MGAS5005		314	1854	1719585	0.000182602
319701	Streptococcus pyogenes MGAS6180		321	1890	1786995	0.000179631
186103	Streptococcus pyogenes MGAS8232		316	1844	1701090	0.000185763
370551	Streptococcus pyogenes MGAS9429		317	1877	1762503	0.000179858
193567	Streptococcus pyogenes SSI1		330	1860	1730730	0.000190671
299768	Streptococcus thermoph. CNRZ1066		275	1598	1277601	0.000215247
264199	Streptococcus thermoph. LMG18311		272	1591	1266436	0.000214776
227882	Streptomyces avermitilis		1215	7670	29418285	4.13008e-05
100226	Streptomyces coelicolor		1294	8148	33199026	3.8977e-05
292459	Symbiobacterium thermophilum		993	3335	5562780	0.000178508
32046	Synechococcus elongatus BP1		723	2474	3061575	0.000236153
269084	Synechococcus elongatus PCC6301		833	2525	3189075	0.000261204
1140	Synechococcus elongatus PCC7942		845	2611	3409966	0.000247803
110662	Synechococcus sp. CC9605		456	2638	3480841	0.000131003
316279	Synechococcus sp. CC9902		498	2304	2655360	0.000187545
84588	Synechococcus sp. WH8102		433	2514	3161355	0.000136967
1148	Synechocystis sp. PCC6803		1294	3565	6356395	0.000203575
56780	Syntrophus aciditrophicus		1400	3168	5019696	0.000278901
273068	Thermoanaerobacter tengcongensis		893	2586	3344991	0.000266966
269800	Thermobifida fusca		399	3109	4834495	8.25319e-05
243274	Thermotoga maritima		693	1846	1704781	0.000406504
262724	Thermus thermophilus HB27		498	1982	1965153	0.000253415
300852	Thermus thermophilus HB8		505	2239	2507680	0.000201381
292415	Thiobacillus denitrificans		1121	2827	3997378	0.000280434
317025	Thiomicrospira crunogena		849	2192	2403528	0.000353231
326298	Thiomicrospira denitrificans		769	2097	2199753	0.000349585
243275	Treponema denticola		2490	2767	3829528	0.000650211
243276	Treponema pallidum
218496	Tropheryma whipplei TW0827		127	783	306936	0.000413767
203267	Tropheryma whipplei Twist		116	808	326836	0.000354918
273119	Ureaplasma parvum		87	611	186966	0.000465325
243277	Vibrio cholerae		2017	3830	7336365	0.000274932
312309	Vibrio fischeri		2193	3800	7221900	0.00030366
223926	Vibrio parahaemolyticus		3077	4832	11676528	0.00026352
216895	Vibrio vulnificus CMCP6		2770	4525	10240075	0.000270506
196600	Vibrio vulnificus YJ016		2832	5028	12642906	0.000223999
36870	Wigglesworthia glossinidia		168	612	187578	0.000895627
292805	Wolbachia endosymbiont		131	805	324415	0.000403804
66077	Wolbachia sp. wMel		189	1195	714610	0.00026448
273121	Wolinella succinogenes		773	2045	2092035	0.000369497
190486	Xanthomonas axonopodis		1881	4423	9783676	0.000192259
190485	Xanthomonas campestris 33913		1577	4177	8725753	0.000180729
314565	Xanthomonas campestris 8004		1643	4273	9131401	0.000179929
341	Xanthomonas campestris vesicat.		2007	4726	11169901	0.000179679
291331	Xanthomonas oryzae KACC10331		1401	4629	10716135	0.000130737
160492	Xylella fastidiosa 9a5c		558	2827	3997378	0.000139592
183190	Xylella fastidiosa Temecula1		466	2036	2073666	0.000224723
229193	Yersinia pestis 91001		1724	4145	8592585	0.000200638
214092	Yersinia pestis CO92		1717	4082	8333403	0.000206038
187410	Yersinia pestis KIM		1565	4100	8407050	0.000186153
273123	Yersinia pseudotuberculosis		1814	4035	8142630	0.000222778
264203	Zymomonas mobilis		477	2041	2083861	0.000228902
272557	Aeropyrum pernix	ARCHAEA	44	2703	3654456	1.20401e-05
224325	Archaeoglobus fulgidus		161	2405	2893215	5.56474e-05
272569	Haloarcula marismortui		237	4243	9003646	2.63227e-05
64091	Halobacterium sp. NRC-1		203	2607	3399528	5.97142e-05
243232	Methanocaldococcus jannaschii		133	1770	1567335	8.48574e-05
259564	Methanococcoides burtonii		226	2273	2584401	8.74477e-05
39152	Methanococcus maripaludis		149	1721	1481781	0.000100555
190192	Methanopyrus kandleri		55	1684	1418770	3.8766e-05
188937	Methanosarcina acetivorans		1846	4538	10298991	0.000179241
269797	Methanosarcina barkeri		1193	3629	6586635	0.000181124
192952	Methanosarcina mazei		1098	3370	5680135	0.000193305
339860	Methanosphaera stadtmanae		55	1534	1177345	4.67153e-05
187420	Methanothermobacter thermautotr.		240	1866	1741911	0.00013778
228908	Nanoarchaeum equitans		10	536	143916	6.9485e-05
348780	Natronomonas pharaonis		164	2822	3983253	4.11724e-05
263820	Picrophilus torridus		119	1535	1178880	0.000100943
13773	Pyrobaculum aerophilum		65	2595	3368310	1.92975e-05
272844	Pyrococcus abyssi		188	1786	1595791	0.00011781
186497	Pyrococcus furiosus		218	2057	2116653	0.000102993
70601	Pyrococcus horikoshii		202	2037	2075703	9.73164e-05
330779	Sulfolobus acidocaldarius		151	2221	2467531	6.11948e-05
2287	Sulfolobus solfataricus		216	2993	4480521	4.82087e-05
273063	Sulfolobus tokodaii		178	2823	3986076	4.46554e-05
69014	Thermococcus kodakarensis		217	2305	2657665	8.16506e-05
273075	Thermoplasma acidophilum		150	1483	1100386	0.000136316
273116	Thermoplasma volcanium		166	1525	1163575	0.000142664
7165	Anopheles gambiae	EUKARYOTA	1815	14364	103169430	1.75924e-05
7460	Apis mellifera		1136	13448	90431076	1.25621e-05
3702	Arabidopsis thaliana		2899	26751	357821376	8.10181e-06
5085	Aspergillus fumigatus		839	9923	49237926	1.70397e-05
9913	Bos taurus		1669	23231	269851296	6.18489e-06
6239	Caenorhabditis elegans		819	19723	194508226	4.21062e-06
5478	Candida glabrata		666	5180	13418790	4.96319e-05
9615	Canis familiaris		1250	18201	165647301	7.54615e-06
7719	Ciona intestinalis		780	10988	60373566	1.29196e-05
237895	Cryptosporidium hominis		101	3934	7740145	1.30489e-05
45157	Cyanidioschyzon merolae		463	5014	12572605	3.68261e-05
7955	Danio rerio		3607	22877	261690003	1.37835e-05
4959	Debaryomyces hansenii		550	6310	19911205	2.76226e-05
44689	Dictyostelium discoideum		647	13557	91902903	7.04004e-06
7227	Drosophila melanogaster		858	13767	94772028	9.0533e-06
6035	Encephalitozoon cuniculi		170	1996	1993006	8.52983e-05
33169	Eremothecium gossypii		550	4718	11132121	4.94066e-05
5207	Filobasidiella neoformans		334	6273	19678401	1.69729e-05
9031	Gallus gallus		1364	18630	173547765	7.85951e-06
184922	Giardia lamblia		78	9646	46527481	1.67643e-06
9606	Homo sapiens		1669	22218	246830871	6.76171e-06
28985	Kluyveromyces lactis		707	5327	14191128	4.98199e-05
9544	Macaca mulatta		1055	21670	234805285	4.49308e-06
13616	Monodelphis domestica		1536	21075	222088350	6.91617e-06
10090	Mus musculus		1747	25613	328025691	5.3258e-06
9598	Pan troglodytes		1959	21630	233939265	8.37397e-06
5833	Plasmodium falciparum		164	5156	13294746	1.23357e-05
10116	Rattus norvegicus		1734	21952	240956128	7.19633e-06
4932	Saccharomyces cerevisiae		731	6680	22314540	3.27589e-05
4896	Schizosaccharomyces pombe		850	5043	12718446	6.68321e-05
31033	Takifugu rubripes		1651	22008	242187036	6.81705e-06
99883	Tetraodon nigroviridis		2103	28005	392154015	5.36269e-06
296543	Thalassiosira pseudonana		4778	11397	64951503	7.35626e-05
8364	Xenopus tropicalis		2974	24405	297814215	9.98609e-06
4952	Yarrowia lipolytica		670	6519	21251940	3.15265e-05
	372 genomes (including strains)		417329	417329
	Bacteria		364722
	Archaea		7684
	Eukaryota		44923

## Sheet: 179 selected genomes
STRING tree v3.0		species		# predicted PPIs (STRING orthology)	# proteins	possible interactions	percentage of predicted vs. possible interactions
		Staphylococcus epidermidis	BACTERIA	505	2519	3173940	0.000159108
		Staphylococcus aureus Mu50		500	2732	3733278	0.000133931
		Staphylococcus aureus N315		508	2600	3381300	0.000150238
		Staphylococcus aureus MW2		512	2656	3528496	0.000145104
		Oceanobacillus iheyensis		1234	3493	6102271	0.00020222
		Bacillus subtilis		2147	4106	8431671	0.000254635
		Bacillus halodurans		2279	4065	8264145	0.00027577
		Bacillus anthracis		1669	5309	14095395	0.000118407
		Bacillus cereus ATCC 10987		1858	5603	15699606	0.000118347
		Bacillus cereus ATCC 14579		2176	5253	13799631	0.000157685
		Listeria innocua		977	3044	4634490	0.000210811
		Listeria monocytogenes F2365		862	2820	3977610	0.000216713
		Listeria monocytogenes EGD		863	2846	4051281	0.000213019
		Enterococcus faecalis		491	3263	5325216	9.22028e-05
		Lactococcus lactis		349	2266	2568511	0.000135876
		Streptococcus mutans		287	1958	1917861	0.000149646
		Streptococcus pneumoniae R6		325	2035	2071630	0.000156881
		Streptococcus pneumoniae TIGR4		327	2095	2195560	0.000148937
		Streptococcus agalactiae V		330	2123	2254626	0.000146366
		Streptococcus agalactiae III		331	2094	2193465	0.000150903
		Streptococcus pyogenes M1		305	1697	1440753	0.000211695
		Streptococcus pyogenes MGAS8232		316	1844	1701090	0.000185763
		Streptococcus pyogenes SSI-1		330	1860	1730730	0.000190671
		Streptococcus pyogenes MGAS315		330	1782	1588653	0.000207723
		Lactobacillus johnsonii		294	1818	1653471	0.000177808
		Lactobacillus plantarum		394	3009	4528545	8.70037e-05
		Phytoplasma Onion yellows		386	754	284635	0.00135612
		Ureaplasma parvum		87	611	186966	0.000465325
		Mycoplasma mycoides		73	1015	515620	0.000141577
		Mycoplasma penetrans		89	1036	537166	0.000165684
		Mycoplasma mobile		90	628	197506	0.000455682
		Mycoplasma pulmonis		101	782	306153	0.0003299
		Mycoplasma gallisepticum		95	727	264628	0.000358995
		Mycoplasma genitalium		86	472	111628	0.000770416
		Mycoplasma pneumoniae		71	665	221445	0.000320621
		Fusobacterium nucleatum		884	2064	2131080	0.000414813
		Thermoanaerobacter tengcongensis		893	2586	3344991	0.000266966
		Clostridium acetobutylicum		3186	3847	7401628	0.000430446
		Clostridium perfringens		763	2722	3706003	0.000205882
		Clostridium tetani		902	2429	2951235	0.000305635
		Gloeobacter violaceus		2079	4427	9801378	0.000212113
		Nostoc sp. PCC 7120		4414	6121	18736381	0.000235584
		Synechocystis sp. PCC6803		1294	3565	6356395	0.000203575
		Synechococcus elongatus		845	2611	3409966	0.000247803
		Synechococcus sp. WH8102		433	2514	3161355	0.000136967
		Prochlorococcus marinus SS120		292	1882	1771903	0.000164795
		Prochlorococcus marinus CCMP1378		295	1712	1466328	0.000201183
		Prochlorococcus marinus MIT9313		749	2262	2559453	0.000292641
		Borrelia burgdorferi		965	1637	1340703	0.000719772
		Treponema denticola		2490	2767	3829528	0.000650211
		Treponema pallidum
		Leptospira interrogans L1-130		1195	3659	6695970	0.000178466
		Leptospira interrogans 56601		1197	4723	11155726	0.000107299
		Caulobacter crescentus		1595	3738	6988191	0.000228242
		Rhizobium loti		4314	7276	26473726	0.000162954
		Bradyrhizobium japonicum		7868	8314	34565455	0.000227626
		Rhodopseudomonas palustris		2441	4815	11594520	0.00021053
		Brucella suis		995	3273	5357901	0.000185707
		Brucella melitensis		884	3034	4604095	0.000192003
		Rhizobium meliloti		3598	6204	19247910	0.000186929
		Agrobacterium tumefaciens WashU		2982	5314	14121955	0.000211161
		Agrobacterium tumefaciens Cereon
		Wolbachia sp. wMel		189	1195	714610	0.00026448
		Rickettsia prowazekii		220	834	348195	0.00063183
		Rickettsia conorii		384	1371	940506	0.000408291
		Coxiella burnetii		438	2050	2102275	0.000208346
		Nitrosomonas europaea		926	2460	3027030	0.00030591
		Chromobacterium violaceum		2784	4407	9713028	0.000286625
		Neisseria meningitidis A		409	2061	2124891	0.00019248
		Neisseria meningitidis B		443	2063	2129016	0.000208077
		Ralstonia solanacearum		2705	5101	13012651	0.000207875
		Bordetella pertussis		921	3449	5949525	0.000154802
		Bordetella bronchiseptica		1364	4994	12472515	0.00010936
		Bordetella parapertussis		1229	4186	8763391	0.000140243
		Shewanella oneidensis		1612	4777	11412253	0.000141252
		Photobacterium profundum		2844	5478	15006981	0.000189512
		Vibrio cholerae		2017	3830	7336365	0.000274932
		Vibrio parahaemolyticus		3077	4832	11676528	0.00026352
		Vibrio vulnificus YJ016		2832	5028	12642906	0.000223999
		Vibrio vulnificus CMCP6		2770	4525	10240075	0.000270506
		Haemophilus ducreyi		340	1713	1468041	0.000231601
		Haemophilus influenzae		292	1702	1449253	0.000201483
		Pasteurella multocida		495	2015	2031120	0.000243708
		Photorhabdus luminescens		1253	4680	10953540	0.000114392
		Escherichia coli K12		1599	4379	9590010	0.000166736
		Escherichia coli O6		1881	5380	14474890	0.000129949
		Escherichia coli O157:H7		2076	5447	14837628	0.000139915
		Escherichia coli EDL933		2114	5438	14788641	0.000142948
		Shigella flexneri 2a 2457T		902	4088	8357916	0.000107922
		Shigella flexneri 2a 301		959	4454	9921285	9.66609e-05
		Salmonella enterica		1525	4349	9459075	0.000161221
		Salmonella typhi		1568	4758	11321661	0.000138496
		Salmonella typhimurium		1927	4533	10276311	0.000187519
		Yersinia pestis CO92		1717	4082	8333403	0.000206038
		Yersinia pestis KIM		1565	4100	8407050	0.000186153
		Yersinia pestis Medievalis		1724	4145	8592585	0.000200638
		Wigglesworthia brevipalpis		168	612	187578	0.000895627
		Blochmannia floridanus		91	583	170236	0.000534552
		Buchnera aphidicola Bp		97	507	128778	0.000753234
		Buchnera aphidicola Sg		122	561	157641	0.00077391
		Buchnera aphidicola APS		123	573	164451	0.000747943
		Xylella fastidiosa 9a5c		558	2827	3997378	0.000139592
		Xylella fastidiosa 700964		466	2036	2073666	0.000224723
		Xanthomonas campestris		2007	4726	11169901	0.000179679
		Xanthomonas axonopodis		1881	4423	9783676	0.000192259
		Pseudomonas syringae		3251	5089	12951505	0.000251013
		Pseudomonas putida		3543	5349	14308575	0.000247614
		Pseudomonas aeruginosa		3744	5568	15504096	0.000241485
		Bdellovibrio bacteriovorus		1326	3583	6420736	0.000206518
		Geobacter sulfurreducens		2530	3446	5939181	0.000425985
		Desulfovibrio vulgaris		2862	3531	6235746	0.000458967
		Campylobacter jejuni		611	1633	1334161	0.000457966
		Wolinella succinogenes		773	2045	2092035	0.000369497
		Helicobacter hepaticus		558	1875	1758750	0.000317271
		Helicobacter pylori J99		458	1491	1112286	0.000411765
		Helicobacter pylori 26695		479	1564	1223830	0.000391394
		Chlamydia muridarum		346	916	419986	0.000823837
		Chlamydia trachomatis		351	894	400065	0.000877357
		Chlamydophila caviae		388	1005	505515	0.000767534
		Chlamydia pneumoniae J138		388	1070	572985	0.000677156
		Chlamydophila pneumoniae TW183		388	1112	618828	0.000626992
		Chlamydia pneumoniae AR39		386	1110	616605	0.000626009
		Chlamydia pneumoniae CWL029		388	1053	554931	0.000699186
		Bifidobacterium longum		242	1729	1495585	0.00016181
		Mycobacterium leprae		191	1607	1292028	0.00014783
		Mycobacterium paratuberculosis		409	4349	9459075	4.32389e-05
		Mycobacterium bovis		378	3919	7681240	4.92108e-05
		Mycobacterium tuberculosis CDC1551		375	4207	8851528	4.23656e-05
		Mycobacterium tuberculosis H37Rv		370	3984	7938120	4.66105e-05
		Corynebacterium diphtheriae		310	2271	2579856	0.000120162
		Corynebacterium efficiens		400	2998	4495501	8.89778e-05
		Corynebacterium glutamicum 13032		439	3056	4671096	9.39822e-05
		Corynebacterium glutamicum				0
		Streptomyces coelicolor		1294	8148	33199026	3.8977e-05
		Streptomyces avermitilis		1215	7670	29418285	4.13008e-05
		Tropheryma whipplei Twist		116	808	326836	0.000354918
		Tropheryma whipplei TW08/27		127	783	306936	0.000413767
		Chlorobium tepidum		535	2254	2541385	0.000210515
		Bacteroides thetaiotaomicron		1757	4814	11589705	0.0001516
		Porphyromonas gingivalis		440	1908	1821186	0.000241601
		Thermus thermophilus		498	1982	1965153	0.000253415
		Deinococcus radiodurans		789	3101	4809651	0.000164045
		Rhodopirellula baltica		1250	7325	26831475	4.65871e-05
		Aquifex aeolicus		822	1551	1203576	0.000682965
		Thermotoga maritima		693	1846	1704781	0.000406504
		Pyrobaculum aerophilum	ARCHAEA	65	2595	3368310	1.92975e-05
		Aeropyrum pernix		44	2703	3654456	1.20401e-05
		Sulfolobus tokodaii		178	2823	3986076	4.46554e-05
		Sulfolobus solfataricus		216	2993	4480521	4.82087e-05
		Halobacterium sp. NRC-1		203	2607	3399528	5.97142e-05
		Nanoarchaeum equitans		10	536	143916	6.9485e-05
		Archaeoglobus fulgidus		161	2405	2893215	5.56474e-05
		Methanosarcina mazei		1098	3370	5680135	0.000193305
		Methanosarcina acetivorans		1846	4538	10298991	0.000179241
		Pyrococcus furiosus		218	2057	2116653	0.000102993
		Pyrococcus abyssi		188	1786	1595791	0.00011781
		Pyrococcus horikoshii		202	2037	2075703	9.73164e-05
		Methanobacterium thermautotrophicum		240	1866	1741911	0.00013778
		Methanopyrus kandleri		55	1684	1418770	3.8766e-05
		Methanococcus jannaschii		133	1770	1567335	8.48574e-05
		Methanococcus maripaludis		149	1721	1481781	0.000100555
		Thermoplasma acidophilum		150	1483	1100386	0.000136316
		Thermoplasma volcanium		166	1525	1163575	0.000142664
		Plasmodium falciparum	EUKARYOTA	164	5156	13294746	1.23357e-05
		Gallus gallus		1364	18630	173547765	7.85951e-06
		Mus musculus		1747	25613	328025691	5.3258e-06
		Rattus norvegicus		1734	21952	240956128	7.19633e-06
		Homo sapiens		1669	22218	246830871	6.76171e-06
		Pan troglodytes		1959	21630	233939265	8.37397e-06
		Takifugu rubripes		1651	22008	242187036	6.81705e-06
		Danio rerio		3607	22877	261690003	1.37835e-05
		Anopheles gambiae		1815	14364	103169430	1.75924e-05
		Drosophila melanogaster		858	13767	94772028	9.0533e-06
		Caenorhabditis briggsae
		Caenorhabditis elegans		819	19723	194508226	4.21062e-06
		Schizosaccharomyces pombe		850	5043	12718446	6.68321e-05
		Eremothecium gossypii		550	4718	11132121	4.94066e-05
		Saccharomyces cerevisiae		731	6680	22314540	3.27589e-05
		Arabidopsis thaliana		2899	26751	357821376	8.10181e-06
		176 genomes (including strains)		186903
		Eukaryota		22417
		Archaea		5322
		Bacteria		159164

## Sheet: 147 selected genomes
pruned STRING tree v3.0	species		# predicted PPIs (STRING orthology)	# proteins	possible interactions	percentage of predicted vs. possible interactions
	Staphylococcus epidermidis	BACTERIA	505	2519	3173940	0.000159108
	Staphylococcus aureus MW2		512	2656	3528496	0.000145104
	Oceanobacillus iheyensis		1234	3493	6102271	0.00020222
	Bacillus subtilis		2147	4106	8431671	0.000254635
	Bacillus halodurans		2279	4065	8264145	0.00027577
	Bacillus anthracis		1669	5309	14095395	0.000118407
	Bacillus cereus ATCC 14579		2176	5253	13799631	0.000157685
	Listeria innocua		977	3044	4634490	0.000210811
	Listeria monocytogenes EGD		863	2846	4051281	0.000213019
	Enterococcus faecalis		491	3263	5325216	9.22028e-05
	Lactococcus lactis		349	2266	2568511	0.000135876
	Streptococcus mutans		287	1958	1917861	0.000149646
	Streptococcus pneumoniae R6		325	2035	2071630	0.000156881
	Streptococcus agalactiae V		330	2123	2254626	0.000146366
	Streptococcus pyogenes SSI-1		330	1860	1730730	0.000190671
	Lactobacillus johnsonii		294	1818	1653471	0.000177808
	Lactobacillus plantarum		394	3009	4528545	8.70037e-05
	Phytoplasma Onion yellows		386	754	284635	0.00135612
	Ureaplasma parvum		87	611	186966	0.000465325
	Mycoplasma mycoides		73	1015	515620	0.000141577
	Mycoplasma penetrans		89	1036	537166	0.000165684
	Mycoplasma mobile		90	628	197506	0.000455682
	Mycoplasma pulmonis		101	782	306153	0.0003299
	Mycoplasma gallisepticum		95	727	264628	0.000358995
	Mycoplasma genitalium		86	472	111628	0.000770416
	Mycoplasma pneumoniae		71	665	221445	0.000320621
	Fusobacterium nucleatum		884	2064	2131080	0.000414813
	Thermoanaerobacter tengcongensis		893	2586	3344991	0.000266966
	Clostridium acetobutylicum		3186	3847	7401628	0.000430446
	Clostridium perfringens		763	2722	3706003	0.000205882
	Clostridium tetani		902	2429	2951235	0.000305635
	Gloeobacter violaceus		2079	4427	9801378	0.000212113
	Nostoc sp. PCC 7120		4414	6121	18736381	0.000235584
	Synechocystis sp. PCC6803		1294	3565	6356395	0.000203575
	Synechococcus elongatus		845	2611	3409966	0.000247803
	Synechococcus sp. WH8102		433	2514	3161355	0.000136967
	Prochlorococcus marinus MIT9313		749	2262	2559453	0.000292641
	Borrelia burgdorferi		965	1637	1340703	0.000719772
	Treponema denticola		2490	2767	3829528	0.000650211
	Leptospira interrogans L1-130		1195	3659	6695970	0.000178466
	Caulobacter crescentus		1595	3738	6988191	0.000228242
	Rhizobium loti		4314	7276	26473726	0.000162954
	Bradyrhizobium japonicum		7868	8314	34565455	0.000227626
	Rhodopseudomonas palustris		2441	4815	11594520	0.00021053
	Brucella suis		995	3273	5357901	0.000185707
	Brucella melitensis		884	3034	4604095	0.000192003
	Rhizobium meliloti		3598	6204	19247910	0.000186929
	Agrobacterium tumefaciens WashU		2982	5314	14121955	0.000211161
	Wolbachia sp. wMel		189	1195	714610	0.00026448
	Rickettsia prowazekii		220	834	348195	0.00063183
	Rickettsia conorii		384	1371	940506	0.000408291
	Coxiella burnetii		438	2050	2102275	0.000208346
	Nitrosomonas europaea		926	2460	3027030	0.00030591
	Chromobacterium violaceum		2784	4407	9713028	0.000286625
	Neisseria meningitidis A		409	2061	2124891	0.00019248
	Ralstonia solanacearum		2705	5101	13012651	0.000207875
	Bordetella pertussis		921	3449	5949525	0.000154802
	Bordetella bronchiseptica		1364	4994	12472515	0.00010936
	Bordetella parapertussis		1229	4186	8763391	0.000140243
	Shewanella oneidensis		1612	4777	11412253	0.000141252
	Photobacterium profundum		2844	5478	15006981	0.000189512
	Vibrio cholerae		2017	3830	7336365	0.000274932
	Vibrio parahaemolyticus		3077	4832	11676528	0.00026352
	Vibrio vulnificus CMCP6		2770	4525	10240075	0.000270506
	Haemophilus ducreyi		340	1713	1468041	0.000231601
	Haemophilus influenzae		292	1702	1449253	0.000201483
	Pasteurella multocida		495	2015	2031120	0.000243708
	Photorhabdus luminescens		1253	4680	10953540	0.000114392
	Escherichia coli EDL933		2114	5438	14788641	0.000142948
	Shigella flexneri 2a 301		959	4454	9921285	9.66609e-05
	Salmonella enterica		1525	4349	9459075	0.000161221
	Salmonella typhi		1568	4758	11321661	0.000138496
	Salmonella typhimurium		1927	4533	10276311	0.000187519
	Yersinia pestis CO92		1717	4082	8333403	0.000206038
	Wigglesworthia brevipalpis		168	612	187578	0.000895627
	Blochmannia floridanus		91	583	170236	0.000534552
	Buchnera aphidicola APS		123	573	164451	0.000747943
	Xylella fastidiosa 9a5c		558	2827	3997378	0.000139592
	Xanthomonas campestris		2007	4726	11169901	0.000179679
	Xanthomonas axonopodis		1881	4423	9783676	0.000192259
	Pseudomonas syringae		3251	5089	12951505	0.000251013
	Pseudomonas putida		3543	5349	14308575	0.000247614
	Pseudomonas aeruginosa		3744	5568	15504096	0.000241485
	Bdellovibrio bacteriovorus		1326	3583	6420736	0.000206518
	Geobacter sulfurreducens		2530	3446	5939181	0.000425985
	Desulfovibrio vulgaris		2862	3531	6235746	0.000458967
	Campylobacter jejuni		611	1633	1334161	0.000457966
	Wolinella succinogenes		773	2045	2092035	0.000369497
	Helicobacter hepaticus		558	1875	1758750	0.000317271
	Helicobacter pylori 26695		479	1564	1223830	0.000391394
	Chlamydia muridarum		346	916	419986	0.000823837
	Chlamydia trachomatis		351	894	400065	0.000877357
	Chlamydophila caviae		388	1005	505515	0.000767534
	Chlamydia pneumoniae J138		388	1070	572985	0.000677156
	Bifidobacterium longum		242	1729	1495585	0.00016181
	Mycobacterium leprae		191	1607	1292028	0.00014783
	Mycobacterium paratuberculosis		409	4349	9459075	4.32389e-05
	Mycobacterium bovis		378	3919	7681240	4.92108e-05
	Mycobacterium tuberculosis H37Rv		370	3984	7938120	4.66105e-05
	Corynebacterium diphtheriae		310	2271	2579856	0.000120162
	Corynebacterium efficiens		400	2998	4495501	8.89778e-05
	Corynebacterium glutamicum 13032		439	3056	4671096	9.39822e-05
	Streptomyces coelicolor		1294	8148	33199026	3.8977e-05
	Streptomyces avermitilis		1215	7670	29418285	4.13008e-05
	Tropheryma whipplei Twist		116	808	326836	0.000354918
	Chlorobium tepidum		535	2254	2541385	0.000210515
	Bacteroides thetaiotaomicron		1757	4814	11589705	0.0001516
	Porphyromonas gingivalis		440	1908	1821186	0.000241601
	Thermus thermophilus		498	1982	1965153	0.000253415
	Deinococcus radiodurans		789	3101	4809651	0.000164045
	Rhodopirellula baltica		1250	7325	26831475	4.65871e-05
	Aquifex aeolicus		822	1551	1203576	0.000682965
	Thermotoga maritima		693	1846	1704781	0.000406504
	Pyrobaculum aerophilum	ARCHAEA	65	2595	3368310	1.92975e-05
	Aeropyrum pernix		44	2703	3654456	1.20401e-05
	Sulfolobus tokodaii		178	2823	3986076	4.46554e-05
	Sulfolobus solfataricus		216	2993	4480521	4.82087e-05
	Halobacterium sp. NRC-1		203	2607	3399528	5.97142e-05
	Nanoarchaeum equitans		10	536	143916	6.9485e-05
	Archaeoglobus fulgidus		161	2405	2893215	5.56474e-05
	Methanosarcina mazei		1098	3370	5680135	0.000193305
	Methanosarcina acetivorans		1846	4538	10298991	0.000179241
	Pyrococcus furiosus		218	2057	2116653	0.000102993
	Pyrococcus abyssi		188	1786	1595791	0.00011781
	Pyrococcus horikoshii		202	2037	2075703	9.73164e-05
	Methanobacterium thermautotrophicum		240	1866	1741911	0.00013778
	Methanopyrus kandleri		55	1684	1418770	3.8766e-05
	Methanococcus jannaschii		133	1770	1567335	8.48574e-05
	Methanococcus maripaludis		149	1721	1481781	0.000100555
	Thermoplasma acidophilum		150	1483	1100386	0.000136316
	Thermoplasma volcanium		166	1525	1163575	0.000142664
	Plasmodium falciparum	EUKARYOTA	164	5156	13294746	1.23357e-05
	Gallus gallus		1364	18630	173547765	7.85951e-06
	Mus musculus		1747	25613	328025691	5.3258e-06
	Rattus norvegicus		1734	21952	240956128	7.19633e-06
	Homo sapiens		1669	22218	246830871	6.76171e-06
	Pan troglodytes		1959	21630	233939265	8.37397e-06
	Takifugu rubripes		1651	22008	242187036	6.81705e-06
	Danio rerio		3607	22877	261690003	1.37835e-05
	Anopheles gambiae		1815	14364	103169430	1.75924e-05
	Drosophila melanogaster		858	13767	94772028	9.0533e-06
	Caenorhabditis briggsae
	Caenorhabditis elegans		819	19723	194508226	4.21062e-06
	Schizosaccharomyces pombe		850	5043	12718446	6.68321e-05
	Eremothecium gossypii		550	4718	11132121	4.94066e-05
	Saccharomyces cerevisiae		731	6680	22314540	3.27589e-05
	Arabidopsis thaliana		2899	26751	357821376	8.10181e-06
	147 genomes		163953
	Eukaryota		22417
	Archaea		5322
	Bacteria		136214

## Sheet: 77 selected genomes
pruned STRING tree v3.0	species		# predicted PPIs (STRING orthology)	# proteins	possible interactions	percentage of predicted vs. possible interactions
	Staphylococcus aureus MW2	BACTERIA	512	2656	3528496	0.000145104
	Oceanobacillus iheyensis		1234	3493	6102271	0.00020222
	Bacillus subtilis		2147	4106	8431671	0.000254635
	Listeria monocytogenes EGD		863	2846	4051281	0.000213019
	Enterococcus faecalis		491	3263	5325216	9.22028e-05
	Lactococcus lactis		349	2266	2568511	0.000135876
	Streptococcus pneumoniae R6		325	2035	2071630	0.000156881
	Lactobacillus johnsonii		294	1818	1653471	0.000177808
	Phytoplasma Onion yellows		386	754	284635	0.00135612
	Mycoplasma genitalium		86	472	111628	0.000770416
	Fusobacterium nucleatum		884	2064	2131080	0.000414813
	Clostridium tetani		902	2429	2951235	0.000305635
	Gloeobacter violaceus		2079	4427	9801378	0.000212113
	Nostoc sp. PCC 7120		4414	6121	18736381	0.000235584
	Synechococcus elongatus		845	2611	3409966	0.000247803
	Synechococcus sp. WH8102		433	2514	3161355	0.000136967
	Borrelia burgdorferi		965	1637	1340703	0.000719772
	Treponema denticola		2490	2767	3829528	0.000650211
	Leptospira interrogans L1-130		1195	3659	6695970	0.000178466
	Caulobacter crescentus		1595	3738	6988191	0.000228242
	Rhizobium loti		4314	7276	26473726	0.000162954
	Bradyrhizobium japonicum		7868	8314	34565455	0.000227626
	Rhodopseudomonas palustris		2441	4815	11594520	0.00021053
	Brucella melitensis		884	3034	4604095	0.000192003
	Rhizobium meliloti		3598	6204	19247910	0.000186929
	Agrobacterium tumefaciens WashU		2982	5314	14121955	0.000211161
	Wolbachia sp. wMel		189	1195	714610	0.00026448
	Rickettsia prowazekii		220	834	348195	0.00063183
	Coxiella burnetii		438	2050	2102275	0.000208346
	Nitrosomonas europaea		926	2460	3027030	0.00030591
	Neisseria meningitidis A		409	2061	2124891	0.00019248
	Ralstonia solanacearum		2705	5101	13012651	0.000207875
	Bordetella pertussis		921	3449	5949525	0.000154802
	Shewanella oneidensis		1612	4777	11412253	0.000141252
	Photobacterium profundum		2844	5478	15006981	0.000189512
	Vibrio cholerae		2017	3830	7336365	0.000274932
	Haemophilus influenzae		292	1702	1449253	0.000201483
	Photorhabdus luminescens		1253	4680	10953540	0.000114392
	Escherichia coli EDL933		2114	5438	14788641	0.000142948
	Shigella flexneri 2a 301		959	4454	9921285	9.66609e-05
	Salmonella enterica		1525	4349	9459075	0.000161221
	Yersinia pestis CO92		1717	4082	8333403	0.000206038
	Wigglesworthia brevipalpis		168	612	187578	0.000895627
	Blochmannia floridanus		91	583	170236	0.000534552
	Buchnera aphidicola APS		123	573	164451	0.000747943
	Xylella fastidiosa 9a5c		558	2827	3997378	0.000139592
	Xanthomonas campestris		2007	4726	11169901	0.000179679
	Pseudomonas aeruginosa		3744	5568	15504096	0.000241485
	Geobacter sulfurreducens		2530	3446	5939181	0.000425985
	Campylobacter jejuni		611	1633	1334161	0.000457966
	Wolinella succinogenes		773	2045	2092035	0.000369497
	Helicobacter pylori 26695		479	1564	1223830	0.000391394
	Chlamydia trachomatis		351	894	400065	0.000877357
	Chlamydia pneumoniae J138		388	1070	572985	0.000677156
	Bifidobacterium longum		242	1729	1495585	0.00016181
	Mycobacterium tuberculosis H37Rv		370	3984	7938120	4.66105e-05
	Corynebacterium glutamicum 13032		439	3056	4671096	9.39822e-05
	Streptomyces coelicolor		1294	8148	33199026	3.8977e-05
	Tropheryma whipplei Twist		116	808	326836	0.000354918
	Porphyromonas gingivalis		440	1908	1821186	0.000241601
	Thermus thermophilus		498	1982	1965153	0.000253415
	Deinococcus radiodurans		789	3101	4809651	0.000164045
	Aquifex aeolicus		822	1551	1203576	0.000682965
	Thermotoga maritima		693	1846	1704781	0.000406504
	Sulfolobus solfataricus	ARCHAEA	216	2993	4480521	4.82087e-05
	Halobacterium sp. NRC-1		203	2607	3399528	5.97142e-05
	Nanoarchaeum equitans		10	536	143916	6.9485e-05
	Methanosarcina mazei		1098	3370	5680135	0.000193305
	Pyrococcus horikoshii		202	2037	2075703	9.73164e-05
	Methanococcus jannaschii		133	1770	1567335	8.48574e-05
	Thermoplasma acidophilum		150	1483	1100386	0.000136316
	Plasmodium falciparum	EUKARYOTA	164	5156	13294746	1.23357e-05
	Homo sapiens		1669	22218	246830871	6.76171e-06
	Drosophila melanogaster		858	13767	94772028	9.0533e-06
	Caenorhabditis elegans		819	19723	194508226	4.21062e-06
	Saccharomyces cerevisiae		731	6680	22314540	3.27589e-05
	Arabidopsis thaliana		2899	26751	357821376	8.10181e-06
	77 genomes		91395
	Eukaryota		7140
	Archaea		14796
	Bacteria		82243
